# Supplementary material for: Governing Agentic AI in Global Education: A Justice-Oriented Framework for Alignment, Responsibility, and Distributed Autonomy
Source: Research Square preprint supplement (doi:10.21203/rs.3.rs-8890914/v1), 2026-02-18
Supplement: Supplementary file 1 [file 2a50272ef2a02ac5bd45efca.docx]

# Table A5. Thematic Clusters and Strategic Analysis

| Theme Cluster | TC# | Theme | Strategic Intensity | Key Strategic Elements | Representative Sources |
| --- | --- | --- | --- | --- | --- |
| Pedagogical Innovation & AI | TC1 | AI & Adaptive Learning | S: ●●●○ W: ●●●○ O: ●●○○ T: ●●●○ | S: Personalization, engagement boost W: Algorithmic bias, data quality O: Fairness-by-design AI T: Teacher deskilling, bias at scale | Ali et al. (2024), Gligorea et al. (2023), Arantes (2023), Mac Fadden et al. (2024), UNESCO (2021), Capraro (2024), Wach (2023) |
| Digital Equity & Data Justice | TC2 | Digital Inequality & Data Equity | S: ●●○○ W: ●●●○ O: ●●●○ T: ●●●● | S: Data-driven personalization W: Policy fragmentation, plagiarism concerns O: AI/AR to bridge inclusion gaps T: Bias amplification, widening divide | Pierce & Cleary (2024), Queiroga et al. (2024), Vassilakopoulou (2023), Timsal et al. (2024), Ventrella & Cotnam-Kappel (2024), Sunny et al. (2024), Miller & Liu (2023) |
| Inclusive & Culturally Responsive EdTech | TC3 | Inclusive Education & Cultural Relevance | S: ●●●● W: ●●●○ O: ●●●● T: ●●●○ | S: Cultural relevance, participatory design W: Western-centric design, tokenism risks O: Decolonial frameworks, localized content T: Digital colonialism, epistemic exclusion | Koole et al. (2024), Shaghaghi et al. (2022), Creed et al. (2024), Pappas et al. (2018), Regmi (2024), Cockerham (2024), Zhan et al. (2022) |
| Post-COVID Educational Resilience | TC4 | Education & COVID-19 Response | S: ●●●○ W: ●●●● O: ●●●○ T: ●●●○ | S: Flexibility, hybrid learning W: Mental health decline, access gaps O: Inclusive policy reform, digital training T: Widening inequalities, retention drop | Engzell (2021), Goudeau (2021), Khlaif (2021), Bashir (2021), Pal (2021), Beaunoyer (2020), Nguyen (2020) |
| Health & Financial Digital Inclusion | TC5 | Digital Health & Financial Inclusion | S: ●●●○ W: ●●●○ O: ●●●○ T: ●●●○ | S: Strong meta-analysis, targeted interventions W: Age/income gaps, low literacy O: Segmented programs, multistakeholder collaboration T: Exclusion risks, widening gaps | Estrela (2023), Ren (2023), Demir (2022), Yao (2022), Aziz (2021), Li (2022), Heeks (2022) |
| Algorithmic Society & Ethics | TC6 | Algorithmic Society & Ethics | S: ●●●○ W: ●●●○ O: ●●●○ T: ●●●● | S: Sociological depth, critical awareness W: Power concentration, dominance bias O: Algorithmic literacy, regulation T: Erosion of autonomy, systemic bias | Burrell (2021), Gran (2021), Wach (2023), Heath et al. (2024), Macgilchrist (2019), Kuhn et al. (2023) |
| Digital Transformation in Schools | TC7 | Digital School Transformation | S: ●●●○ W: ●●●○ O: ●●●○ T: ●●●○ | S: Efficiency, engagement, personalization W: Digital capacity gaps, low readiness O: Post-COVID digitalization, policy support T: Inter-school inequality, digital fatigue | Timotheou (2023), Sunny et al. (2024), Miller & Liu (2023), Balli & Singla (2024), Marques Queiroga et al. (2024), Weisberg & Dawson (2024), Yang & Hong (2024) |
| Sustainability & SDGs in EdTech | TC8 | Sustainability & SDGs in EdTech | S: ●●●○ W: ●●●○ O: ●●●○ T: ●●○○ | S: Integration of SDGs, contextual learning W: Teacher unfamiliarity, infrastructure limits O: Curriculum development, global collaboration T: Access inequality, resource gaps | Álvarez-Otero et al. (2018), Hübscher et al. (2024), Chalmeta & Barbeito-Caamaño (2024), McGarr (2023), Mukhuty (2022), OECD (2023) |
| Gamification & STEM Motivation | TC9 | Gamification & STEM Motivation | S: ●●●○ W: ●●○○ O: ●●●○ T: ●●○○ | S: Motivation, retention, soft skills W: Inconsistent design, novelty fade O: STEM integration, skill-building games T: Cultural mismatch, unequal access | Kalogiannakis et al. (2021), Zhang (2024), Shenkoya & Kim (2023), Apps et al. (2019), Wang et al. (2024) |
| AR/VR for Immersive Learning | TC10 | AR/VR for Immersive Learning | S: ●●●○ W: ●●●○ O: ●●●○ T: ●●●○ | S: Experiential learning, collaboration W: Accessibility barriers, high costs O: Participatory AR/VR, localized content T: Institutional resistance, digital ableism | Creed et al. (2024), Esposito (2024), Eljak et al. (2024) |
| Teacher Digital Competence & PD | TC11 | Teacher Digital Competence | S: ●●●○ W: ●●●○ O: ●●●○ T: ●●●○ | S: Increased SDG awareness, behavior change W: Low baseline knowledge, curriculum pressure O: Integration of SDGs in teacher training T: Systemic resistance, lack of school support | McGarr (2023), Weisberg & Dawson (2024), Yang & Hong (2024), Pappas et al. (2018), Ventrella & Cotnam-Kappel (2024) |
| Global South & Development | TC12 | Global South & Digital Development | S: ●●○○ W: ●●●○ O: ●●●○ T: ●●●● | S: New conceptual frameworks, critical insights W: Value extraction by dominant groups, low connectivity O: Policy intervention frameworks, indigenous innovation T: Structural inequality reinforcement | Heeks (2022), Bonina (2021), Aziz (2021), Sunny et al. (2024), Timsal et al. (2024), Khlaif (2021) |
| Elderly & Digital Inclusion | TC13 | Elderly & Digital Inclusion | S: ●●●○ W: ●●●○ O: ●●●○ T: ●●●○ | S: Practical recommendations, critical issue spotlight W: Limited access, low literacy, social isolation O: Digital training programs, connectivity initiatives T: Double exclusion: social & digital | Seifert (2021), Xie (2020), Jaarsveld (2020), Livingstone (2020), Wasserman (2020) |
| Future of Work & Skills | TC14 | Future of Work & Skills | S: ●●●○ W: ●●●○ O: ●●●○ T: ●●●○ | S: Multidisciplinary review, diverse theoretical perspectives W: Job polarization, wage inequality O: Education reform, creativity-based jobs T: Technological unemployment, dehumanization of work | Kolade (2022), Ciarli (2021), Mukhuty (2022), Du (2020), Lin (2021) |
| Data & Platform Governance | TC15 | Data & Platform Governance | S: ●●●○ W: ●●●○ O: ●●●○ T: ●●●○ | S: Conceptual clarity, research agenda W: Focus on developing nations, lack of Southern perspective O: Integration with sustainability research T: Structural inequality perpetuation | Vassilakopoulou (2023), Lythreatis (2022), Bonina (2021), Yao (2022), Korhonen et al. (2024) |
| Social Media & Digital Communication | TC16 | Social Media & Digital Communication | S: ●●●○ W: ●●●○ O: ●●●○ T: ●●●○ | S: Rapid information spread, global collaboration W: Misinformation, limited active engagement O: Critical media literacy education T: Harm to marginalized groups | Chalmeta & Barbeito-Caamaño (2024), Heath et al. (2024), Twenge (2021), Nguyen (2020) |

Use the "Insert Citation" button to add citations to this document.
