# Supplementary material for: Governing Agentic AI in Global Education: A Justice-Oriented Framework for Alignment, Responsibility, and Distributed Autonomy
Source: Research Square preprint supplement (doi:10.21203/rs.3.rs-8890914/v1), 2026-02-18
Supplement: Supplementary file 2 [file 49d05d1ce550f440a8b4cefc.docx]

# Table A4. Thematic SWOT Analysis of Digital Education and Equity

| T# | Theme | Strengths (S) | Weaknesses (W) | Opportunities (O) | Threats (T) | Key Sources |
| --- | --- | --- | --- | --- | --- | --- |
| T1 | **AI in Learning** | Personalization, improved learning outcomes, inclusion | Algorithmic bias, plagiarism, content quality | Improving learning outcomes, curriculum adaptation | Teacher skill decline, AI dependency | Ali et al. (2024),, Gligorea et al. (2023), UNESCO (2021) |
| T2 | **Continuing Education Technology** | SDGs integration, contextual learning | Lack of familiarity with teachers, limited infrastructure | Sustainable curriculum development, WebGIS | Limited access to technology, gaps | Álvarez-Otero et al. (2018), Hübscher et al. (2024) |
| T3 | **Technology Practices & Inequality** | Strong theoretical framework (Bourdieu) | Inequality of access and digital capabilities | Critical research for inclusive policies | Widening digital divide | Apps et al. (2019), Kuhn et al. (2023) |
| T4 | **AI Personalization & Teacher Rights** | Personalization of learning, teacher rights protected | Algorithmic bias, unrepresentative data | Raising teacher awareness, AI ethics | Systemic discrimination, de-skilling of teachers | Arantes (2023), Mac Fadden et al. (2024) |
| T5 | **Scale of EdTech Initiatives** | Dynamic scale models (quantity, diffusion, quality) | Heterogeneous context, limited resources | Model replication in developing countries | Funding unsustainability, cultural resistance | Balli & Singla (2024) |
| T6 | **Social Network for SDGs** | Rapid information dissemination, global collaboration | Limited active engagement, misinformation | SDGs awareness campaign, public education | Digital divide, massive misinformation | Chalmeta & Barbeito-Caamaño (2024) |
| T7 | **Participatory Action Research** | Adult-youth collaboration, deep understanding | Time and resource intensive | Positive social change, local innovation | Inequality of participation, cultural barriers | Cockerham (2024) |
| T8 | **Inclusive AR/VR** | High accessibility potential, immersive experience | Physical/cognitive barriers, high costs | Development of universal accessibility standards | Lack of regulation, digital ableism | Creed et al. (2024) |
| T9 | **E-Learning & Cloud Computing** | Scalability, cost efficiency, global access | Data security, infrastructure dependency | SaaS/PaaS/IaaS integration, hybrid cloud | Cloud access gap, data privacy | Eljak et al. (2024) |
| T10 | **Digital Internationalization** | Place flexibility, hybrid identity, global collaboration | Internet access gap, uneven experiences | Geographic inclusion, virtual exchange | Regional inequality, digital divide | Esposito (2024) |
| T11 | **Social Media Audit as EdTech** | Digital critical awareness, platform design audit | Design discrimination, biased algorithms | Critical media literacy education | Harm to marginalized groups, ethics of use | Heath et al. (2024) |
| T12 | **Gamification in Science** | Increased motivation, high engagement | Game design is ineffective, novelty fades | Science curriculum integration, structured gamification | Over-gamification, losing focus of learning | Kalogiannakis et al. (2021) |
| T13 | **Decolonization of Educational Technology** | Inclusion, diverse representation, digital justice | Western dominance, English bias | Local knowledge, contextual design | Reinforcement of structural inequality | Koole et al. (2024) |
| T14 | **Diversity Data Gaps** | Data for inclusive policies, transparency | Non-representative data, sampling bias | Increased accountability, diversity analysis | Neglect of minority groups | Korhonen et al. (2024) |
| T15 | **Postdigital Digital Inequality** | Multiframework theoretical tools, critical analysis | Complexity of analysis, high abstraction | Critical understanding of inequality, a holistic approach | Invisible power structures | Kuhn et al. (2023) |
| T16 | **AI & Digital Inequality** | Personalization, teacher support, ethical governance | Unequal access, social bias | Inclusive education, AI for justice | Widening digital inequality | Mac Fadden et al. (2024) |
| T17 | **Cruel Optimism in EdTech** | High hopes for justice, critical reflection | Obstructive data practices, systemic bias | System redesign, data ethics | Reinforcement of structural inequalities | Macgilchrist (2019) |
| T18 | **Data-Driven for School Equity** | School factor analysis, policy recommendations | Limitations of open data, implementation complexity | Digital governance, equal access to education | Political resistance, slow adaptation | Marques Queiroga et al. (2024), Queiroga et al. (2024) |
| T19 | **Sustainable Teacher Digital Competence** | Raising awareness of SDGs, changing behavior | Low prior knowledge, curriculum pressure | Integration of SDGs in teacher training | Systemic resistance, lack of school support | McGarr (2023) |
| T20 | **Disaster Capitalism & Digital Inequality** | Critical framework, transformative approach | Private sector exploitation, access gap | Community mobilization, generative change | Reinforcement of structural inequality, marginalization | Miller & Liu (2023) |
| T21 | **Inclusive Education & Policy** | Positive teacher attitudes, commitment to inclusive policies | Limited training, insufficient resources | Increased funding, inclusive training | Cultural resistance, curriculum burden | Pappas et al. (2018) |
| T22 | **The Digital Divide in Education** | Representative national data, multivariate analysis | Inequality of home vs school access, demographic disparity | Improving technology resources in schools | Widening achievement gap, social inequality | Pierce & Cleary (2024) |
| T23 | **Learning Technology & Global Inequality** | Potential for broad access, personalization | Digital inequality, artificial communities, epistemic exclusion | Post-2030 education goals, digital inclusion | Widening learning gap, dehumanization of education | Regmi (2024) |
| T24 | **Multilingual Educational Video Translation** | Strengthening mother tongue, cultural adaptation | Limited quality content in local languages | Model replication for other languages, digital inclusion | High development costs, infrastructure barriers | Shaghaghi et al. (2022) |
| T25 | **Digital Transformation of Higher Education** | Sustainable curriculum development, pedagogical innovation | Technology readiness gap, digitalization risks | Gamification, datafication, AI/AR integration | Institutional backwardness, inequality of access and outcomes | Shenkoya & Kim (2023) |
| T26 | **The Technology Gap in Education in India** | Personalization, accessibility, collaboration | Issues of price, access, pedagogical alignment | Increasing student equity and engagement | Widening digital divide, low teacher adoption | Sunny et al. (2024) |
| T27 | **Socio-Digital Disadvantage in Education** | Critical consciousness, student agency | Experiences of alienation, digital literacy inequality | Additional support, transforming the learning experience | The perpetuation of socio-digital inequality | Timsal et al. (2024) |
| T28 | **Digital Capital & Inequality in Elementary Schools** | Rich teacher perspective, identification of real inequality | Device gap, intended use, digital confidence | Teacher professional development, fair resource allocation | Escalation of the gap between experience and learning outcomes | Ventrella & Cotnam-Kappel (2024) |
| T29 | **Digital Device Usage & Academic Achievement** | Strong evidence meta-analysis, differentiation of purposes of use | Negative correlation with entertainment/gaming use | Evidence-based policy guidance, targeted interventions | Misuse of technology, negative impact on achievement | Wang et al. (2024) |
| T30 | **Digital Equality Mindset of Prospective Teachers** | Evolution of mindset in five dimensions, curricular approach | Limitations of a single course, challenges of real implementation | Fairer technology integration practices | School system resistance, policy misalignment | Weisberg & Dawson (2024) |
| T31 | **The Technology Gap in Early Childhood Education** | Hybridity of tradition and innovation, glocal analysis | Teacher practice gaps, uneven learning experiences | Curriculum reform, contextual teacher training | Inequality of access and quality of digital learning | Yang & Hong (2024) |
| T32 | **Bibliometric Analysis of STEM Education** | Global trend map, identification of key topics (equality, pedagogy) | Regional disparities, different focus of developed vs developing countries | International collaboration, cross-disciplinary integration | Research imbalance, dominance of Western countries | Zhan et al. (2022) |
| T33 | **Transforming Education through Digital Technology** | Accessibility, engagement, data-driven decision making | Technology barriers, pedagogical adaptation, data privacy | Immersive platform innovation, deep personalization | Cybersecurity risks, dehumanization of learning interactions | Zhang (2024) |
| T34 | **The Impact of Generative AI on Socioeconomic Inequality** | Democratization of content, productivity, personalization | Misinformation, unequal distribution of benefits, digital divide | Pro-justice policies, interdisciplinary research | Exacerbation of inequality, destabilization of the labor market | Capraro (2024) |
| T35 | **The Impact of Digital Technology on School Digital Capacity** | Increased efficiency, engagement, personalization | Digital capacity gap, low readiness, learning inequality | Lessons from the pandemic, increasing digitalization | Widening gaps between schools, financial burden | Timotheou (2023) |
| T36 | **The Dark Side of Generative AI (ChatGPT)** | Efficiency, content innovation | Poor quality, algorithmic bias, privacy violations, job loss | Market regulation, AI ethics, worker retraining | Social manipulation, socioeconomic inequality, technological stress | Watch (2023) |
| T37 | **Digital Divide in Information Systems** | Mature conceptual model, clear research agenda | Focus on developed countries, lack of Global South perspective | Integration with sustainability research, digital inclusion | Perpetuation of structural inequality | Vassilakopoulou (2023) |
| T38 | **Digital Finance & Industrial Structure Improvement** | Significant impact on industrial upgrading, positive spatial spillover | Dependence on local economic conditions | Accelerating digital infrastructure in underdeveloped areas | Widening regional disparities | Ren (2023) |
| T39 | **Digital Health Literacy** | Robust meta-analysis, identification of determinants | Age, education, income gap | Segmented interventions for vulnerable groups | Digital health exclusion worsens access to services | Star (2023) |
| T40 | **Digital Divide: Overview & Research Agenda** | Comprehensive factor classification, identification of new levels & forms | Multidimensional complexity, lack of practical solutions | A guide for organizations to reduce the gap | New forms of divide (internet access, algorithm awareness) | Lythreatis (2022) |
| T41 | **Fintech, Financial Inclusion & Income Inequality** | Evidence that financial inclusion reduces inequality | The impact is stronger in high-income countries. | Support for the UN & G20 agenda | Inequality remains high in poor countries | Demir (2022) |
| T42 | **Digital Healthcare Inequality** | Mapping the factors causing inequality | Adoption disability, different health outcomes | Multi-stakeholder collaboration for equity | Exclusion of low socio-economic groups | Yao (2022) |
| T43 | **SDG & Industry 4.0 through Social Responsibility** | HRM as an enabler, inclusive practices | Resistance to change, digital skills gap | Multi-stakeholder collaboration, adaptive curriculum | The threat of unemployment, socio-economic inequality | Mukhuty (2022) |
| T44 | **Jobs 5.0: The Future of Work** | Multidisciplinary review, diverse theoretical perspectives | Job polarization, wage inequality | Education reform, creativity-based jobs | Technological unemployment, dehumanization of work | Kolade (2022) |
| T45 | **Digital Finance & Environmental Inequality** | Mitigating environmental inequality, supporting green innovation | Dependence on local government capacity | Convergence of innovation capacity between regions | Industrial pollution remains high in underdeveloped areas | Li (2022) |
| T46 | **Digital Inequality in the Global South** | A new concept explaining detrimental inclusion | Extraction of value by dominant groups | Framework for policy interventions | Strengthening structural inequality through digital | Heeks (2022) |
| T47 | **Learning Loss due to School Closure (COVID-19)** | Rich data, strong research design | The learning gap widens in less educated families | Focused remedial policy | Long-term educational inequality | Engzell (2021) |
| T48 | **Satellite-Terrestrial Technology & Network Security** | Energy efficiency & safety increased | High technical complexity, uncertainty assumptions | Implementation in remote areas | Cybersecurity vulnerabilities | Lin (2021) |
| T49 | **Double Exclusion: Digital & Social in the Elderly** | Critical issues highlighted, practical recommendations | Limited access, low literacy, isolation | Senior digital inclusion initiative | Marginalization of vulnerable groups | Seifert (2021) |
| T50 | **Digital Platform for Development** | Clear conceptual framework, comprehensive research agenda | The impact of development has not been measured well | Indigenous innovation, alternative platforms | Exacerbation of inequality, the dark side of platforms | Bonina (2021) |
| T51 | **Digital Technology, Innovation & Skills** | Understanding technology-skills coevolution | Skills gap, radical reorganization | New job creation, open innovation | Wage inequality, labor market disruption | Ciarli (2021) |
| T52 | **Algorithmic Society** | In-depth sociological analysis, identification of elites & cybertariat | Concentration of power, dominant actuarial logic | Community resistance, algorithm regulation | Erosion of autonomy, systemic algorithmic bias | Burrell (2021) |
| T53 | **Algorithmic Awareness as the New Digital Divide** | Typology of algorithmic consciousness, empirical data | Demographic gaps in awareness | Algorithmic literacy education | New divide deepens digital inequality | Gran (2021) |
| T54 | **Digital Financial Inclusion in Bangladesh** | Critical frameworks go beyond the adopter/non-adopter binary | Lack of connectivity, financial literacy, social awareness | Holistic approach to infrastructure & education | Persistent financial exclusion | Aziz (2021) |
| T55 | **Academic Achievement Gap during Lockdown** | Multidisciplinary analysis, practical recommendations | Dependence on family, uneven digital resources | A more inclusive education policy post-pandemic | The widening achievement gap between social classes | Goudeau (2021) |
| T56 | **OECD Digital Education Outlook 2023** | Comprehensive policy guide, comparative analysis | Challenges of equity, trust, effectiveness | Leveraging AI for personalization & innovation | AI bias risks, technology dependency, capacity gaps | OECD (2023) |
| T57 | **Global Rise in Youth Loneliness** | Big PISA data, cross-country analysis | Negative correlation with psychological well-being | Evidence-based adolescent mental health policy | The negative impact of technology on emotional well-being | Twenge (2021) |
| T58 | **Post-COVID Adaptation in Higher Education** | Positive experiences with online open-book assessments | Inequality in learning spaces, mental health declines | Hybrid model for laboratory & flexibility | Student retention declines, digital divide widens | Bashir (2021) |
| T59 | **Student Engagement in COVID-19 Emergency Learning** | In-depth, multi-perspective qualitative approach | Cultural factors hinder women's participation | Improving content quality & teacher presence | Digital privacy is under threat, the digital divide is widening | Khlaif (2021) |
| T60 | **Student Perceptions of Video-Based Learning** | Powerful integrative model, accurate usage prediction | Moderation of digital inequality is not significant | Improved system design according to individual character | Adoption resistance if features are not up to the task | Pal (2021) |
| T61 | **COVID-19 & Digital Inequality: The Reciprocal Impact** | Comprehensive review, clear mitigation strategies | Unequal access, low digital literacy | Multi-sector collaboration for digital inclusion | Escalation of socio-economic inequality | Beaunoyer (2020) |
| T62 | **Supply Chain Fintech Innovation with Blockchain** | Transparency, security, efficiency increased | Implementation complexity, high costs | Widespread adoption in logistics & manufacturing sectors | Immature regulations, cybersecurity risks | Du (2020) |
| T63 | **Parenting for a Digital Future** | A research-based guide for parents | Parental anxiety, lack of digital skills | Strengthening family digital literacy | Online risk exposure for children | Livingstone (2020) |
| T64 | **Changes in Digital Communication During the Pandemic** | Mapping new digital communication trends | Digital communication access & skills gap | Future research on digital equity | Marginalization of less connected groups | Nguyen (2020) |
| T65 | **Digital Inclusion for Seniors During COVID-19** | Practical recommendations for access & support | Technological barriers, social isolation | Digital training program for the elderly | Social exclusion & worsening health | Xie (2020) |
| T66 | **Adapting Suicide Prevention Strategies During the Pandemic** | Evidence-based approach, digital adaptation | Limited access to mental health services | Telepsychiatry & online interventions | Increased risk of suicide due to isolation | Wasserman (2020) |
| T67 | **The Impact of COVID-19 on the Elderly & the Importance of Closing the Digital Divide** | Highlighting critical issues, calls for action | Isolation, lack of access to technology, declining mental health | Connectivity initiatives & technology support | Double exclusion: social & digital | Jaarsveld (2020) |
| T68 | Digital Education Ecosystem & Policy Guidance | - Comprehensive: includes various component ecosystem (EMIS, LMS, digital assessment).  - Based on OECD survey data and studies comparative between countries.  - Provides guide structured and actionable policies​ followed up.  - Includes AI issues in education with equity perspective. | - More nature descriptive and normative, less analysis critical in-depth. -  Survey data Possible No covers non-OECD context in general adequate.  - No There is evaluation implementation or impact term long. | - Can become global benchmark for maker policy.  - Encourage responsible AI integration Responsible and fair.  - Facilitate benchmarking between countries. | - No “one-size-fits-all” risk adjustment adequate contextual support.  - Dependence on inadequate digital infrastructure and capacity evenly distributed.  - Potential exclusion group marginal in digital transformation. | OECD (2023) |
| T69 | Adolescent Loneliness & Digital Technology | - Longitudinal data at scale large (PISA, 37 countries, n > 1 million).  - Analysis multivariate with control variables economics and demography.  - Shows consistent global pattern (loneliness increased in 36 countries).  - Linking loneliness with smartphone and internet access. | - Cross-sectional design (causality No can proven).  - Only measures “school loneliness”, not encompassing loneliness in a general.  - No explore mechanism psychosocial in a way deep. | - Can push intervention policy related health adolescent mentality.  - Basis for study advanced about impact technology towards well-being.  - Strengthening argument For regulations use technology in adolescents. | - Increased loneliness can make things worse crisis adolescent mental health.  - Digital technology can make things worse isolation social If no managed with good.  - Risk stigmatization technology without balanced solution.​ | Twenge (2021) |
| T70 | Hybrid Learning & Digital Equity in Higher Education | - Study empirical based survey with question open and closed.  - Highlight experience real student during pandemic.  - Identifying digital divide and inequality access.  - Offers recommendation practical for hybrid learning. | - Sample limited (151 students) from one university). -  Survey time (August 2020) may be No represent experience term long.  - No there is quantitative data deep about mental health impact. | - Hybrid models can increase flexibility and inclusion.  - Can encourage universities to invest in digital infrastructure and mental support.  - Opening opportunity for pedagogy innovative and assessment alternative. | - The digital divide can widen inequality education.  - Decline mental well-being can influence retention and achievement academic - Challenges​  technical and pedagogical in implementation of hybrid learning. | Bashir (2021) |
| T71 | AI in Education: Policy & Ethical Framework | - Comprehensive guide from an international body (UNESCO).  - Connecting AI with SDG 4 (education) inclusive and quality).  - Highlighting risk ethics and inequality.  - Offering recommendation clear and oriented policies​ action. | - Characteristic normative and prospective, not yet tested implementation.  - Challenges technical and financial for implementation in developing countries.  - Potential resistance from stakeholders interest education. | - AI can personalize learning and improving access education.  - Opening opportunity global collaboration in fair AI development.  - Can strengthen teacher and management capacity education. | - AI can make things worse digital and social inequality.  - Data privacy and algorithmic bias can harm group vulnerable.  - Slow regulation​ can left behind from development technology. | UNESCO (2021) |

Use the "Insert Citation" button to add citations to this document.
