# Supplementary material for: Governing Agentic AI in Global Education: A Justice-Oriented Framework for Alignment, Responsibility, and Distributed Autonomy
Source: Research Square preprint supplement (doi:10.21203/rs.3.rs-8890914/v1), 2026-02-18
Supplement: Supplementary file 3 [file 759f3ca0a9352192f651b9cd.docx]

# Table A2: Thematic Coding Agreement

| ID Study | Author's (Year) | Theme | Sub-Theme | Kappa Score  (Coder A) | Kappa Score (Coder B) | Kappa Score (Coder C-Researcher) | Agreement |
| --- | --- | --- | --- | --- | --- | --- | --- |
| S1 | Ali et al. (2024)* | AI in Learning | ChatGPT in Education | 0.75 | 0.70 | 0.82 | Very High |
| S2 | Álvarez-Otero (2018) * | Continuing Education Technology | SDGs, WebGIS, TPACK | 0.68 | 0.72 | 0.80 | High |
| S3 | Apps et al. (2019)* | Student Technology Practice | Bourdieu's Theory of Practice, Digital Inequality | 0.71 | 0.69 | 0.78 | High |
| S4 | Arantes (2023) * | AI Personalization in the Classroom | Teacher Rights, Algorithmic Bias | 0.73 | 0.74 | 0.85 | Very High |
| S5 | Balli & Singla (2024)* | Scale of EdTech Initiatives | CLIx, Quantity, Diffusion, Quality | 0.70 | 0.68 | 0.79 | High |
| S6 | Chalmeta & Barbeito-Caamaño (2024) | Social Network for SDGs | Sustainable Awareness, Social media | 0.72 | 0.71 | 0.81 | Very High |
| S7 | Cockerham (2024) * | Participatory Action Research | Adult-Youth Collaboration, Technology | 0.69 | 0.73 | 0.83 | Very High |
| S8 | Creed et al. (2024)* | Inclusive AR/VR | Accessibility, Disability | 0.76 | 0.75 | 0.87 | Very High |
| S9 | Eljak et al. (2024) * | E-Learning & Cloud Computing | Architecture, Security, SaaS, PaaS | 0.74 | 0.72 | 0.84 | Very High |
| S10 | Esposito (2024)* | Digital Internationalization | Virtual Exchange, Hybrid Place | 0.71 | 0.70 | 0.82 | Very High |
| S11 | Gligorea et al. (2023)* | AI in Adaptive Learning | Personalization, Learning Outcomes | 0.77 | 0.76 | 0.88 | Very High |
| S12 | Heath et al. (2024) * | Social Media Audit as EdTech | Algorithmic Discrimination, Ethics | 0.73 | 0.74 | 0.85 | Very High |
| S13 | Hübscher et al. (2024) | Continuing Marketing Education | SDGs, MESD Framework | 0.70 | 0.71 | 0.81 | Very High |
| S14 | Kalogiannakis et al. (2021)* | Gamification in Science | Motivation, Theoretical Framework | 0.75 | 0.73 | 0.84 | Very High |
| S15 | Koole et al. (2024)* | Decolonization of Educational Technology | Global Inequality, Inclusion | 0.78 | 0.77 | 0.89 | Very High |
| S16 | Mac Fadden et al. (2024)* | AI & Digital Inequality | Sociological Perspective, Access | 0.76 | 0.75 | 0.87 | Very High |
| S17 | Macgilchrist (2019) * | Cruel Optimism in EdTech | Datafication, Educational Justice | 0.71 | 0.72 | 0.83 | Very High |
| S18 | Queiroga et al. (2024)* | Data-Driven for School Equity | School Factors, Education Policy | 0.74 | 0.73 | 0.85 | Very High |
| S19 | Kuhn et al. (2023) * | Digital Inequality | Theoretical Kaleidoscope, Postdigital | 0.74 | 0.73 | 0.86 | Very High |
| S20 | Korhonen et al. (2024)* | Diversity Data Gaps | Forestry Sector, Inclusion | 0.72 | 0.71 | 0.82 | Very High |
| S21 | McGarr (2023)* | Sustainable Teacher Digital Competence | SDGs, Teacher Education | 0.72 | 0.70 | 0.81 | High |
| S22 | Miller & Liu (2023)* | Disaster Capitalism & Digital Inequality | Post-COVID, Transforming Education | 0.75 | 0.73 | 0.84 | Very High |
| S23 | Pappas et al. (2018)* | Inclusive Education | Teacher Attitudes, Inclusion Policies | 0.71 | 0.69 | 0.80 | High |
| S24 | Pierce & Cleary (2024) * | The Digital Divide in Education | Access to Technology, Social Inequality | 0.76 | 0.75 | 0.86 | Very High |
| S25 | Marques Queiroga et al. (2024) | Data-Driven for School Equity | School Factors, Education Policy | 0.75 | 0.74 | 0.86 | Very High |
| S26 | Regmi (2024) * | Learning Technology & Global Inequality | Generative AI, Lifelong Learning | 0.73 | 0.74 | 0.83 | Very High |
| S27 | Shaghaghi et al. (2022) | Multilingual Educational Video Translation | Mother Tongue-Based Learning | 0.70 | 0.72 | 0.81 | High |
| S28 | Shenkoya & Kim  (2023) * | Digital Transformation of Higher Education | Education 4.0, Gamification, AI | 0.77 | 0.76 | 0.87 | Very High |
| S29 | Sunny et al. (2024)* | The Technology Gap in Education in India | Access, Adoption, Digital Equality | 0.73 | 0.74 | 0.84 | Very High |
| S30 | Timsal et al. (2024) * | Socio-Digital Disadvantage in Management Education | Hidden Curriculum, Inequality of Access | 0.75 | 0.73 | 0.86 | Very High |
| S31 | UNESCO (2021) * | AI and Education: A Policy Guide | Inclusion, Ethics, AI Governance | 0.78 | 0.77 | 0.88 | Very High |
| S32 | Ventrella & Cotnam-Kappel (2024)* | Digital Capital & Inequality in Elementary Schools | Teacher Perspective, Student Experience | 0.74 | 0.75 | 0.85 | Very High |
| S33 | Wang et al. (2024)* | Meta-Analysis of Digital Device Use & Academic Achievement | Purpose of Use, Duration, Moderator | 0.76 | 0.75 | 0.87 | Very High |
| S34 | Weisberg & Dawson (2024) * | Digital Equality Mindset of Prospective Teachers | Technology Integration, Inclusive Curriculum | 0.73 | 0.74 | 0.84 | Very High |
| S35 | Yang & Hong (2024) * | The Technology Gap in Early Childhood Education | Glocalization, Teacher Practices, Children's Learning | 0.72 | 0.71 | 0.82 | High |
| S36 | Zhan et al. (2022) * | Bibliometric Analysis of STEM Education | Global Distribution, Disciplinary Integration, Research Trends | 0.75 | 0.74 | 0.86 | Very High |
| S37 | Zhang (2024)* | Transforming Education through Digital Technology | Digital Platforms, Virtual/Augmented Reality | 0.71 | 0.72 | 0.83 | High |
| S38 | Capraro et al. (2024) * | The Impact of Generative AI on Socioeconomic Inequality | Misinformation, Jobs, Education, Health | 0.77 | 0.76 | 0.88 | Very High |
| S39 | Timotheou et al. (2023) | The Impact of Digital Technology on School Digital Capacity | Digital Transformation, Supporting & Inhibiting Factors | 0.74 | 0.73 | 0.85 | Very High |
| S40 | Wach et al. (2023) | The Dark Side of Generative AI (ChatGPT) | Ethical, Social, Economic, Regulatory Risks | 0.76 | 0.75 | 0.87 | Very High |
| S41 | Vassilakopoulou & Hustad (2023) | Digital Divide in Information Systems | Contributing Factors, Research Agenda | 0.75 | 0.74 | 0.86 | Very High |
| S42 | Ren (2023) | Digital Finance & Industrial Structure Improvement | Spatial Spillover, Innovation, Entrepreneurship | 0.73 | 0.72 | 0.84 | Very High |
| S43 | Star, (2023) | Digital Health Literacy | Sociodemographic Factors, Meta-Analysis | 0.76 | 0.75 | 0.87 | Very High |
| S44 | Lythreatis, (2022) | Digital Divide: Overview & Research Agenda | Factors, Levels, New Forms | 0.74 | 0.73 | 0.85 | Very High |
| S45 | Demir (2022) | Fintech, Financial Inclusion & Income Inequality | Quantile Regression, Developing Countries | 0.75 | 0.74 | 0.86 | Very High |
| S46 | Yao (2022) | Digital Healthcare Inequality | Scoping Review, the Determining Factor | 0.73 | 0.74 | 0.84 | Very High |
| S47 | Mukhuty (2022) | SDG & Industry 4.0 through Social Responsibility | HRM, Human Barriers, Inclusive Practices | 0.74 | 0.75 | 0.85 | Very High |
| S48 | Kolade (2022) | Jobs 5.0: The Future of Work | Digital Transformation, Socio-Technical Theory | 0.76 | 0.75 | 0.87 | Very High |
| S49 | Li (2022) | Digital Finance & Environmental Inequality | Environmental Equity, Green Innovation | 0.75 | 0.74 | 0.86 | Very High |
| S50 | Heeks (2022) | Digital Inequality in the Global South | Adverse Digital Incorporation | 0.77 | 0.76 | 0.88 | Very High |
| S51 | Engzell (2021) * | Learning Loss due to School Closure (COVID-19) | Netherlands, Education Gap | 0.74 | 0.73 | 0.85 | Very High |
| S52 | Lin (2021) | Satellite-Terrestrial Technology & Network Security | Hybrid Beamforming, Energy Efficiency | 0.72 | 0.71 | 0.83 | High |
| S53 | Seifert (2021) | Double Exclusion: Digital & Social in the Elderly | COVID-19, Long-Term Care Facilities | 0.75 | 0.74 | 0.86 | Very High |
| S54 | Bonina (2021) | Digital Platform for Development | Research Agenda, Inclusion & Inequality | 0.76 | 0.75 | 0.87 | Very High |
| S55 | Ciarli (2021) | Digital Technology, Innovation & Skills | Coevolution, Future Trajectory | 0.74 | 0.73 | 0.85 | Very High |
| S56 | Burrell (2021) | Algorithmic Society | Coding Elite, Cybertariat, Actuarial Logic | 0.77 | 0.76 | 0.88 | Very High |
| S57 | Gran et al. (2021). | Algorithmic Awareness as the New Digital Divide | Awareness & Attitudes towards Algorithms | 0.75 | 0.74 | 0.86 | Very High |
| S58 | Aziz & Naima (2021) | Digital Financial Inclusion in Bangladesh | Critical Framework, Social Dynamics | 0.73 | 0.72 | 0.84 | Very High |
| S59 | Goudeau et al. (2021)* | Academic Achievement Gap during Lockdown | COVID-19, Distance Learning, Social Class | 0.76 | 0.75 | 0.87 | Very High |
| S60 | OECD (2024) * | OECD Digital Education Outlook 2023 | Digital Ecosystem, AI, Education Policy | 0.78 | 0.77 | 0.89 | Very High |
| S61 | Twenge (2021) | Global Rise in Youth Loneliness | The Influence of Smartphone & Internet Access | 0.76 | 0.75 | 0.87 | Very High |
| S62 | Bashir (2021) * | Post-COVID Adaptation in Higher Education | Bioscience Experience, Hybrid Learning | 0.74 | 0.73 | 0.85 | Very High |
| S6 3 | Khlaif (2021) * | Student Engagement in COVID-19 Emergency Learning | Infrastructure, Culture, Digital Inequality Factors | 0.75 | 0.74 | 0.86 | Very High |
| S64 | Pal (2021) | Student Perceptions of Video-Based Learning | TAM/TTF Model, Gender, Digital Inequality | 0.73 | 0.74 | 0.84 | Very High |
| S65 | Beaunoyer (2020) * | COVID-19 & Digital Inequality: The Reciprocal Impact | Mitigation Strategies, Access & Digital Skills | 0.76 | 0.75 | 0.87 | Very High |
| S66 | Du (2020) | Supply Chain Fintech Innovation with Blockchain | Efficiency, Transparency, Security | 0.72 | 0.71 | 0.83 | High |
| S67 | Livingstone (2020) | Parenting for a Digital Future | Parents' Hopes & Fears, Digital Literacy | 0.75 | 0.74 | 0.86 | Very High |
| S68 | Nguyen et al. (2020) | Changes in Digital Communication During the Pandemic | Implications of Digital Inequality, Research Agenda | 0.74 | 0.73 | 0.85 | Very High |
| S69 | Xie (2020) | Digital Inclusion for Seniors During COVID-19 | Access to Information, Services, Social Connectedness | 0.75 | 0.74 | 0.86 | Very High |
| S70 | Wasserman (2020) | Adapting Suicide Prevention Strategies During the Pandemic | Mental Health, Evidence-Based Interventions | 0.73 | 0.72 | 0.84 | Very High |
| S71 | Martins Van Jaarsveld (2020) | The Impact of COVID-19 on the Elderly & the Importance of Closing the Digital Divide | Mental Health, Access to Technology | 0.74 | 0.73 | 0.85 | Very High |

Ali, D., Fatemi, Y., Boskabadi, E., Nikfar, M., Ugwuoke, J., & Ali, H. (2024). ChatGPT in Teaching and Learning: A Systematic Review. *Education Sciences*, *14*(6), 643. https://doi.org/10.3390/educsci14060643

Álvarez-Otero, J., & de Lázaro y Torres, M. L. (2018). Education in sustainable development goals using the spatial data infrastructures and the TPACK model. *Education Sciences*, *8*(4), 171. https://doi.org/10.3390/educsci8040171

Apps, T., Beckman, K., & Bennett, S. (2019). Engaging with Bourdieu’s theory of practice: an empirical tool for exploring school students’ technology practice. *Technology, Pedagogy and Education*, *28*(4), 413–423. https://doi.org/10.1080/1475939X.2019.1657934

Arantes, J. A. (2023). Personalization in Australian K-12 classrooms: how might digital teaching and learning tools produce intangible consequences for teachers’ workplace conditions? *Australian Educational Researcher*, *50*(3), 863–880. https://doi.org/10.1007/s13384-022-00530-7

Aziz, A., & Naima, U. (2021). Rethinking digital financial inclusion: Evidence from Bangladesh. *Technology in Society*, *64*, 101509. https://doi.org/10.1016/j.techsoc.2020.101509

Balli, O., & Singla, E. (2024). Dimensions of scale: Connected Learning Initiative (CLIx)—a case study of educational technology initiative in India. *Educational Technology Research and Development*, *72*(4), 2213–2235. https://doi.org/10.1007/s11423-024-10372-y

Bashir, A., Bashir, S., Rana, K., Lambert, P., & Vernallis, A. (2021). Post-COVID-19 Adaptations; the Shifts Towards Online Learning, Hybrid Course Delivery and the Implications for Biosciences Courses in the Higher Education Setting. *Frontiers in Education*, *6*. https://doi.org/10.3389/feduc.2021.711619

Beaunoyer, E., Dupéré, S., & Guitton, M. J. (2020). COVID-19 and digital inequalities: Reciprocal impacts and mitigation strategies. *Computers in Human Behavior*, *111*, 106424. https://doi.org/10.1016/j.chb.2020.106424

Bo, N. S. W. (2024). OECD digital education outlook 2023: Towards an effective education ecosystem. In *Hungarian Educational Research Journal* (OECD Digital Education Outlook, Vol. 15, Issue 2). OECD. https://doi.org/10.1556/063.2024.00340

Bonina, C., Koskinen, K., Eaton, B., & Gawer, A. (2021). Digital platforms for development: Foundations and research agenda. *Information Systems Journal*, *31*(6), 869–902. https://doi.org/10.1111/isj.12326

Burrell, J., & Fourcade, M. (2021). The Society of Algorithms. *Annual Review of Sociology*, *47*(1), 213–237. https://doi.org/10.1146/annurev-soc-090820-020800

Capraro, V., Lentsch, A., Acemoglu, D., Akgun, S., Akhmedova, A., Bilancini, E., Bonnefon, J.-F., Brañas-Garza, P., Butera, L., Douglas, K. M., Everett, J. A. C., Gigerenzer, G., Greenhow, C., Hashimoto, D. A., Holt-Lunstad, J., Jetten, J., Johnson, S., Kunz, W. H., Longoni, C., … Viale, R. (2024). The impact of generative artificial intelligence on socioeconomic inequalities and policy making. *PNAS Nexus*, *3*(6). https://doi.org/10.1093/pnasnexus/pgae191

Chalmeta, R., & Barbeito-Caamaño, A. M. (2024). Framework for using online social networks for sustainability awareness. *Online Information Review*, *48*(2), 334–353. https://doi.org/10.1108/OIR-03-2023-0116

Ciarli, T., Kenney, M., Massini, S., & Piscitello, L. (2021). Digital technologies, innovation, and skills: Emerging trajectories and challenges. *Research Policy*, *50*(7), 104289. https://doi.org/10.1016/j.respol.2021.104289

Cockerham, D. (2024). Participatory action research: building understanding, dialogue, and positive actions in a changing digital environment. *Educational Technology Research and Development*, *72*(5), 2763–2791. https://doi.org/10.1007/s11423-023-10294-1

Creed, C., Al-Kalbani, M., Theil, A., Sarcar, S., & Williams, I. (2024). Inclusive Augmented and Virtual Reality: A Research Agenda. *International Journal of Human–Computer Interaction*, *40*(20), 6200–6219. https://doi.org/10.1080/10447318.2023.2247614

Demir, A., Pesqué-Cela, V., Altunbas, Y., & Murinde, V. (2022). Fintech, financial inclusion and income inequality: a quantile regression approach. *The European Journal of Finance*, *28*(1), 86–107. https://doi.org/10.1080/1351847X.2020.1772335

Du, M., Chen, Q., Xiao, J., Yang, H., & Ma, X. (2020). Supply Chain Finance Innovation Using Blockchain. *IEEE Transactions on Engineering Management*, *67*(4), 1045–1058. https://doi.org/10.1109/TEM.2020.2971858

Eljak, H., Ibrahim, A. O., Saeed, F., Hashem, I. A. T., Abdelmaboud, A., Syed, H. J., Abulfaraj, A. W., Ismail, M. A. Bin, & Elsafi, A. (2024). E-Learning-Based Cloud Computing Environment: A Systematic Review, Challenges, and Opportunities. *IEEE Access*, *12*, 7329–7355. https://doi.org/10.1109/ACCESS.2023.3339250

Engzell, P., Frey, A., & Verhagen, M. D. (2021). Learning loss due to school closures during the COVID-19 pandemic. *Proceedings of the National Academy of Sciences*, *118*(17). https://doi.org/10.1073/pnas.2022376118

Esposito, C. (2024). Reimagining place in internationalization at a distance: An exploration of students’ experiences in virtual exchange. *British Journal of Educational Technology*. https://doi.org/10.1111/bjet.13545

Estrela, M., Semedo, G., Roque, F., Ferreira, P. L., & Herdeiro, M. T. (2023). Sociodemographic determinants of digital health literacy: A systematic review and meta-analysis. *International Journal of Medical Informatics*, *177*, 105124. https://doi.org/10.1016/j.ijmedinf.2023.105124

Gligorea, I., Cioca, M., Oancea, R., Gorski, A.-T., Gorski, H., & Tudorache, P. (2023). Adaptive Learning Using Artificial Intelligence in e-Learning: A Literature Review. *Education Sciences*, *13*(12), 1216. https://doi.org/10.3390/educsci13121216

Goudeau, S., Sanrey, C., Stanczak, A., Manstead, A., & Darnon, C. (2021). Why lockdown and distance learning during the COVID-19 pandemic are likely to increase the social class achievement gap. *Nature Human Behaviour*, *5*(10), 1273–1281. https://doi.org/10.1038/s41562-021-01212-7

Gran, A.-B., Booth, P., & Bucher, T. (2021). To be or not to be algorithm aware: a question of a new digital divide? *Information, Communication & Society*, *24*(12), 1779–1796. https://doi.org/10.1080/1369118X.2020.1736124

Heath, M. K., Krutka, D. G., & Gleason, B. (2024). “See results anyway”: auditing social media as educational technology. *Information and Learning Sciences*, *125*(9), 650–672. https://doi.org/10.1108/ILS-12-2023-0205

Heeks, R. (2022). Digital inequality beyond the digital divide: conceptualizing adverse digital incorporation in the global South. *Information Technology for Development*, *28*(4), 688–704. https://doi.org/10.1080/02681102.2022.2068492

Hübscher, C., Hensel-Börner, S., & Henseler, J. (2024). Marketing education for sustainable development. *Spanish Journal of Marketing - ESIC*, *28*(3), 310–333. https://doi.org/10.1108/SJME-06-2022-0131

Kalogiannakis, M., Papadakis, S., & Zourmpakis, A.-I. (2021). Gamification in Science Education. A Systematic Review of the Literature. *Education Sciences*, *11*(1), 22. https://doi.org/10.3390/educsci11010022

Khlaif, Z. N., Salha, S., & Kouraichi, B. (2021). Emergency remote learning during COVID-19 crisis: Students’ engagement. *Education and Information Technologies*, *26*(6), 7033–7055. https://doi.org/10.1007/s10639-021-10566-4

Kolade, O., & Owoseni, A. (2022). Employment 5.0: The work of the future and the future of work. *Technology in Society*, *71*, 102086. https://doi.org/10.1016/j.techsoc.2022.102086

Koole, M., Smith, M., Traxler, J., Adam, T., & Footring, S. (2024). Decolonising Educational Technology. *Education Sciences*, *14*(10), 1070. https://doi.org/10.3390/educsci14101070

Korhonen, J., Panwar, R., Henderson, J., Fernholz, K., Leggett, Z., Meyer, E., & Bhuta, A. A. R. (2024). Gaps in diversity representation and data insufficiencies in the U.S. forest sector workforce analysis. *Trees, Forests and People*, *15*, 100486. https://doi.org/10.1016/j.tfp.2023.100486

Kuhn, C., Khoo, S.-M., Czerniewicz, L., Lilley, W., Bute, S., Crean, A., Abegglen, S., Burns, T., Sinfield, S., Jandrić, P., Knox, J., & MacKenzie, A. (2023). *Understanding Digital Inequality: A Theoretical Kaleidoscope* (pp. 333–373). https://doi.org/10.1007/978-3-031-35411-3_17

Li, G., Zhang, R., Feng, S., & Wang, Y. (2022). Digital finance and sustainable development: Evidence from environmental inequality in China. *Business Strategy and the Environment*, *31*(7), 3574–3594. https://doi.org/10.1002/bse.3105

Lin, Z., Lin, M., Champagne, B., Zhu, W.-P., & Al-Dhahir, N. (2021). Secrecy-Energy Efficient Hybrid Beamforming for Satellite-Terrestrial Integrated Networks. *IEEE Transactions on Communications*, *69*(9), 6345–6360. https://doi.org/10.1109/TCOMM.2021.3088898

Livingstone, S., & Blum-Ross, A. (2020). *Parenting for a Digital Future*. Oxford University PressNew York. https://doi.org/10.1093/oso/9780190874698.001.0001

Lythreatis, S., Singh, S. K., & El-Kassar, A.-N. (2022). The digital divide: A review and future research agenda. *Technological Forecasting and Social Change*, *175*, 121359. https://doi.org/10.1016/j.techfore.2021.121359

Mac Fadden, I., García-Alonso, E.-M., & López Meneses, E. (2024). Science Mapping of AI as an Educational Tool Exploring Digital Inequalities: A Sociological Perspective. *Multimodal Technologies and Interaction*, *8*(12), 106. https://doi.org/10.3390/mti8120106

Macgilchrist, F. (2019). Cruel optimism in edtech: when the digital data practices of educational technology providers inadvertently hinder educational equity. *Learning, Media and Technology*, *44*(1), 77–86. https://doi.org/10.1080/17439884.2018.1556217

Marques Queiroga, E., Sarmanho Siqueira, E., Dos Santos Portela, C., Damasceno Cordeiro, T., Ibert Bittencourt, I., Isotani, S., Ferreira Mello, R., Muñoz, R., & Cechinel, C. (2024). Data-Driven Strategies for Achieving School Equity: Insights From Brazil and Policy Recommendations. *IEEE Access*, *12*, 101646–101659. https://doi.org/10.1109/ACCESS.2024.3422822

Martins Van Jaarsveld, G. (2020). The Effects of COVID-19 Among the Elderly Population: A Case for Closing the Digital Divide. *Frontiers in Psychiatry*, *11*. https://doi.org/10.3389/fpsyt.2020.577427

McGarr, O. (2023). Investigating student teachers’ responses to including sustainable development as part of their professional digital competence development. *Technology, Pedagogy and Education*, *32*(5), 653–665. https://doi.org/10.1080/1475939X.2023.2265934

Miller, R., & Liu, K. (2023). After the Virus: Disaster Capitalism, Digital Inequity, and Transformative Education for the Future of Schooling. *Education and Urban Society*, *55*(5), 533–554. https://doi.org/10.1177/00131245211065419

Mukhuty, S., Upadhyay, A., & Rothwell, H. (2022). Strategic sustainable development of Industry 4.0 through the lens of social responsibility: The role of human resource practices. *Business Strategy and the Environment*, *31*(5), 2068–2081. https://doi.org/10.1002/bse.3008

Nguyen, M. H., Gruber, J., Fuchs, J., Marler, W., Hunsaker, A., & Hargittai, E. (2020). Changes in Digital Communication During the COVID-19 Global Pandemic: Implications for Digital Inequality and Future Research. *Social Media + Society*, *6*(3). https://doi.org/10.1177/2056305120948255

Pal, D., & Patra, S. (2021). University Students’ Perception of Video-Based Learning in Times of COVID-19: A TAM/TTF Perspective. *International Journal of Human–Computer Interaction*, *37*(10), 903–921. https://doi.org/10.1080/10447318.2020.1848164

Pappas, M. A., Papoutsi, C., & Drigas, A. S. (2018). Policies, Practices, and Attitudes toward Inclusive Education: The Case of Greece. *Social Sciences*, *7*(6), 90. https://doi.org/10.3390/socsci7060090

Pierce, G. L., & Cleary, P. F. (2024). The persistent educational digital divide and its impact on societal inequality. *PLOS ONE*, *19*(4), e0286795. https://doi.org/10.1371/journal.pone.0286795

Queiroga, E. M., Siqueira, E. S., Portela, C. D. S., Cordeiro, T. D., Bittencourt, I. I., Isotani, S., Mello, R. F., Muñoz, R., & Cechinel, C. (2024). Data-Driven Strategies for Achieving School Equity: Insights From Brazil and Policy Recommendations. *IEEE Access*, *12*, 101646–101659. https://doi.org/10.1109/ACCESS.2024.3422822

Regmi, K. D. (2024). The rise of learning technology in an unequal world: potentials and limitations in enhancing lifelong learning. *International Review of Education*, *70*(3), 433–452. https://doi.org/10.1007/s11159-023-10058-2

Ren, X., Zeng, G., & Gozgor, G. (2023). How does digital finance affect industrial structure upgrading? Evidence from Chinese prefecture-level cities. *Journal of Environmental Management*, *330*, 117125. https://doi.org/10.1016/j.jenvman.2022.117125

Seifert, A., Cotten, S. R., & Xie, B. (2021). A Double Burden of Exclusion? Digital and Social Exclusion of Older Adults in Times of COVID-19. *The Journals of Gerontology: Series B*, *76*(3), e99–e103. https://doi.org/10.1093/geronb/gbaa098

Shaghaghi, N., Ghosh, S., Ali, F., & Ali, A. B. (2022). *An English to Urdu Educational Video Translation Pipeline to Reinforce Mother-Tongue Based Learning* (pp. 61–74). https://doi.org/10.1007/978-3-030-96585-3_5

Shenkoya, T., & Kim, E. (2023). Sustainability in Higher Education: Digital Transformation of the Fourth Industrial Revolution and Its Impact on Open Knowledge. *Sustainability (Switzerland)*, *15*(3). https://doi.org/10.3390/su15032473

Sunny, B., Shukla, N., Mishra, A. K., & Jaheer Mukthar, K. P. (2024). *Addressing the Educational Technology Divide in India: An Analysis of Access, Adoption, and Equity in Digital Learning* (pp. 103–112). https://doi.org/10.1007/978-981-99-7798-7_8

Timotheou, S., Miliou, O., Dimitriadis, Y., Sobrino, S. V., Giannoutsou, N., Cachia, R., Monés, A. M., & Ioannou, A. (2023). Impacts of digital technologies on education and factors influencing schools’ digital capacity and transformation: A literature review. *Education and Information Technologies*, *28*(6), 6695–6726. https://doi.org/10.1007/s10639-022-11431-8

Timsal, A., Shah, U., & Hodgson, V. (2024). Socio-Digital Disadvantage Within Management Education: A Study of MBA Students’ Experiences of Digital Technologies. *Journal of Management Education*, *48*(1), 52–79. https://doi.org/10.1177/10525629231208186

Twenge, J. M., Haidt, J., Blake, A. B., McAllister, C., Lemon, H., & Le Roy, A. (2021). Worldwide increases in adolescent loneliness. *Journal of Adolescence*, *93*(1), 257–269. https://doi.org/10.1016/j.adolescence.2021.06.006

UNESCO. (2021). AI and education: guidance for policy-makers. In *AI and education: guidance for policy-makers*. UNESCO Publishing. https://doi.org/10.54675/pcsp7350

Vassilakopoulou, P., & Hustad, E. (2023). Bridging Digital Divides: a Literature Review and Research Agenda for Information Systems Research. *Information Systems Frontiers*, *25*(3), 955–969. https://doi.org/10.1007/s10796-020-10096-3

Ventrella, F. M., & Cotnam-Kappel, M. (2024). Examining digital capital and digital inequalities in Canadian elementary schools: Insights from teachers. *Telematics and Informatics*, *86*, 102070. https://doi.org/10.1016/j.tele.2023.102070

Wach, K., Duong, C. D., Ejdys, J., Kazlauskaitė, R., Korzynski, P., Mazurek, G., Paliszkiewicz, J., & Ziemba, E. (2023). The dark side of generative artificial intelligence: A critical analysis of controversies and risks of ChatGPT. *Entrepreneurial Business and Economics Review*, *11*(2), 7–30. https://doi.org/10.15678/EBER.2023.110201

Wang, F., Ni, X., Zhang, M., & Zhang, J. (2024). Educational digital inequality: A meta-analysis of the relationship between digital device use and academic performance in adolescents. *Computers & Education*, *213*, 105003. https://doi.org/10.1016/j.compedu.2024.105003

Wasserman, D., Iosue, M., Wuestefeld, A., & Carli, V. (2020). Adaptation of evidence‐based suicide prevention strategies during and after the <scp>COVID</scp> ‐19 pandemic. *World Psychiatry*, *19*(3), 294–306. https://doi.org/10.1002/wps.20801

Weisberg, L., & Dawson, K. (2024). Picturing digital equity in the curriculum: Cultivating preservice teachers’ digital equity mindsets in a technology integration course. *Computers & Education*, *211*, 104988. https://doi.org/10.1016/j.compedu.2024.104988

Xie, B., Charness, N., Fingerman, K., Kaye, J., Kim, M. T., & Khurshid, A. (2020). When Going Digital Becomes a Necessity: Ensuring Older Adults’ Needs for Information, Services, and Social Inclusion During COVID-19. *Journal of Aging & Social Policy*, *32*(4–5), 460–470. https://doi.org/10.1080/08959420.2020.1771237

Yang, T., & Hong, X. (2024). The Educational Technology Divide in Glocalisation: A Perspective for Interpreting Early Childhood Teachers’ Practices of ICT Implementation. *Early Education and Development*, *35*(1), 150–168. https://doi.org/10.1080/10409289.2023.2231321

Yao, R., Zhang, W., Evans, R., Cao, G., Rui, T., & Shen, L. (2022). Inequities in Health Care Services Caused by the Adoption of Digital Health Technologies: Scoping Review. *Journal of Medical Internet Research*, *24*(3), e34144. https://doi.org/10.2196/34144

Zhan, Z., Shen, W., Xu, Z., Niu, S., & You, G. (2022). A bibliometric analysis of the global landscape on STEM education (2004-2021): towards global distribution, subject integration, and research trends. *Asia Pacific Journal of Innovation and Entrepreneurship*, *16*(2), 171–203. https://doi.org/10.1108/APJIE-08-2022-0090

Zhang, Z. (2024). *Revolutionizing Education: The Transformative Power of Educational Technology in Online Learning* (pp. 523–529). https://doi.org/10.2991/978-2-38476-253-8_62
