# Supplementary material for: Governing Agentic AI in Global Education: A Justice-Oriented Framework for Alignment, Responsibility, and Distributed Autonomy
Source: Research Square preprint supplement (doi:10.21203/rs.3.rs-8890914/v1), 2026-02-18
Supplement: Supplementary file 4 [file 90fe1303d8e34eeadb619062.docx]

## **Table A1**. Methodological Quality Appraisal of Included Studies (NOS/CASP)

| No | Author(s), Year | Study Design | Appraisal Tool | Key Quality Criteria Assessed* | Score / Rating | Quality Level |
| --- | --- | --- | --- | --- | --- | --- |
|  | Ali et al. (2024)* | Systematic Review | CASP | Clear aims; rigorous search; transparent synthesis; limitations addressed | High | High |
|  | Álvarez-Otero (2018) * | Mixed Methods | CASP | Clear research design; appropriate data collection; triangulation | Moderate–High | Moderate |
|  | Apps et al. (2019)* | Qualitative | CASP | Theoretical coherence; reflexivity; analytical rigor | High | High |
|  | Arantes (2023) * | Conceptual / Policy Analysis | CASP | Argument coherence; use of evidence; policy relevance | Moderate | Moderate |
|  | Balli & Singla (2024)* | Case Study | CASP | Context clarity; methodological transparency; analytical depth | High | High |
|  | Chalmeta & Barbeito-Caamaño (2024) | Framework Development | CASP | Conceptual grounding; applicability; validation logic | Moderate | Moderate |
|  | Cockerham (2024) * | Meta-synthesis (PAR) | CASP | Methodological justification; synthesis rigor | High | High |
|  | Creed et al. (2024)* | Qualitative / Stakeholder Study | CASP | Sampling clarity; stakeholder diversity; analytical transparency | High | High |
|  | Eljak et al. (2024) * | Systematic Review | NOS | Selection (2); comparability (2); outcome assessment (3) | High | High |
|  | Esposito (2024)* | Qualitative (FGD) | CASP | Data saturation; coding transparency; reflexivity | High | High |
|  | Gligorea et al. (2023)* | Literature Review | NOS | Search rigor; synthesis clarity; handling bias | High | High |
|  | Heath et al. (2024) * | Technological Audit | CASP | Analytical rigor; ethical positioning; evidence coherence | High | High |
|  | Hübscher et al. (2024) | Bibliometric Review | NOS | Data source clarity; analytical transparency | High | High |
|  | Kalogiannakis et al. (2021)* | Systematic Review | NOS | Selection (2); comparability (2); outcomes (3) | High | High |
|  | Koole et al. (2024)* | Conceptual / Critical Review | CASP | Theoretical depth; critical reflexivity | High | High |
|  | Mac Fadden et al. (2024)* | Bibliometric Analysis | NOS | Database coverage; rigor mapping | High | High |
|  | Macgilchrist (2019) * | Ethnographic | CASP | Contextual depth; analytical transparency | High | High |
|  | Queiroga et al. (2024)* | Quantitative Policy Study | NOS | Sampling (2); comparability (2); outcomes (3) | High | High |
|  | Kuhn et al. (2023) * | Theoretical Synthesis | CASP | Conceptual integration; analytical coherence | High | High |
|  | Korhonen et al. (2024)* | Quantitative Workforce Analysis | NOS | Data integrity; analytical rigor | High | High |
|  | McGarr (2023)* | Survey-based Empirical Study | NOS | Sampling (2); comparability (2); outcome measurement (3) | High | High |
|  | Miller & Liu (2023)* | Critical Theoretical Analysis | CASP | Conceptual rigor; analytical coherence; policy relevance | High | High |
|  | Pappas et al. (2018)* | Quantitative Survey | NOS | Selection (2); comparability (2); outcome assessment (3) | High | High |
|  | Pierce & Cleary (2024) * | Large-scale Quantitative Study | NOS | Representative sampling (3); comparability (2); statistical rigor (3) | High | High |
|  | Marques Queiroga et al. (2024) | Data-driven Policy Analysis | NOS | Data integrity (3); comparability (2); outcome robustness (3) | High | High |
|  | Regmi (2024) * | Critical Conceptual Analysis | CASP | Theoretical grounding; reflexivity; global relevance | High | High |
|  | Shaghaghi et al. (2022) | Applied Design / Pipeline Study | CASP | Design clarity; cultural alignment; implementation logic | Moderate–High | Moderate |
|  | Shenkoya & Kim  (2023) * | Systematic Review & Bibliometrics | NOS | Search rigor (3); comparability (2); synthesis clarity (3) | High | High |
|  | Sunny et al. (2024)* | Narrative Review / Policy Analysis | CASP | Argument coherence; critical balance; relevance to equity | Moderate | Moderate |
|  | Timsal et al. (2024) * | Qualitative Phenomenographic Study | CASP | Methodological transparency; analytical depth; reflexivity | High | High |
|  | UNESCO (2021) * | Policy Guidance Document | CASP | Evidence integration; ethical grounding; global applicability | High | High |
|  | Ventrella & Cotnam-Kappel (2024)* | Qualitative Case Study | CASP | Sampling rationale; data saturation; analytical transparency | High | High |
|  | Wang et al. (2024)* | Meta-analysis | NOS | Study selection (3); comparability (2); statistical validity (3) | High | High |
|  | Weisberg & Dawson (2024) * | Qualitative Longitudinal Study | CASP | Design coherence; analytical rigor; pedagogical relevance | High | High |
|  | Yang & Hong (2024) * | Qualitative Case Study | CASP | Contextual depth; triangulation; analytical transparency | High | High |
|  | Zhan et al. (2022) * | Bibliometric Analysis | NOS | Data source rigor (3); mapping validity (2); interpretive clarity (2) | High | High |
|  | Zhang (2024)* | Conceptual / Applied Review | CASP | Argument coherence; technological relevance; limited awareness | Moderate | Moderate |
|  | Capraro et al. (2024) * | Interdisciplinary Critical Review | CASP | Analytical rigor; policy integration; interdisciplinary validity | High | High |
|  | Timotheou et al. (2023) | Narrative Literature Review | CASP | Thematic coherence; evidence linkage; analytical transparency | Moderate–High | Moderate |
|  | Wach et al. (2023) | Critical Conceptual Analysis | CASP | Conceptual depth; risk taxonomy clarity; policy relevance | High | High |
|  | Vassilakopoulou & Hustad (2023) | Systematic Literature Review & Research Agenda | CASP | Review rigor; conceptual mapping; coherence agenda | High | High |
|  | Ren (2023) | Longitudinal Panel Quantitative Study | NOS | Selection (3); comparability (2); outcome robustness (3) | High | High |
|  | Star, (2023) | Systematic Review & Meta-analysis | NOS | Search rigor (3); comparability (2); statistical validity (3) | High | High |
|  | Lythreatis, (2022) | Systematic Review | NOS | Study selection (3); thematic synthesis (2); analytical clarity (3) | High | High |
|  | Demir (2022) | Cross-national Panel Quantitative Study | NOS | Sampling (3); comparability (2); outcome measurement (3) | High | High |
|  | Yao (2022) | Scoping Review | CASP | Search transparency; descriptive synthesis; equity focus | High | High |
|  | Mukhuty (2022) | Integrative Thematic Literature Review | CASP | Thematic rigor; conceptual integration; policy relevance | High | High |
|  | Kolade (2022) | Systematic Review | CASP | Coherence review; theoretical integration; policy insight | High | High |
|  | Li (2022) | Longitudinal Panel Quantitative Study | NOS | Selection (3); comparability (2); robustness checks (3) | High | High |
|  | Heeks (2022) | Conceptual Theory-Building Study | CASP | Conceptual originality; theoretical grounding; applicability | High | High |
|  | Engzell (2021) * | Quasi-experimental Large-scale Study | NOS | Representativeness (3); comparability (3); outcome validity (3) | High | High |
|  | Lin (2021) | Simulation / Technical Design | CASP (Adapted for Modeling Studies) | Clear objectives; methodological transparency; validation via simulation; limitations addressed | High | High |
|  | Seifert (2021) | Conceptual/Policy-Oriented Analysis | CASP | Articulation problems; population relevance; policy insight | Moderate | Moderate |
|  | Bonina (2021) | Conceptual Review & Research Agenda | CASP | Conceptual clarity; synthesis depth; research framing | High | High |
|  | Ciarli (2021) | Conceptual/Evidence-informed Review | CASP | Analytical coherence; grounding literature; foresight value | High | High |
|  | Burrell (2021) | Critical Sociological Review | CASP | Theoretical depth; analytical rigor; societal relevance | High | High |
|  | Gran et al. (2021). | Quantitative Survey & Cluster Analysis | NOS | Sampling (2); comparability (2); outcome analysis (3) | High | High |
|  | Aziz & Naima (2021) | Qualitative Conceptual–Empirical Study | CASP | Context sensitivity; analytical depth; theoretical contribution | High | High |
|  | Goudeau et al. (2021)* | Conceptual–Empirical Policy Analysis | CASP | Argument coherence; interdisciplinary grounding; policy relevance | High | High |
|  | OECD (2024) * | Policy Report / Comparative Analysis | CASP for Policy Research | Clear aims; use of evidence; relevance; stakeholder perspective; applicability | Moderate–High | Moderate |
|  | Twenge (2021) | Cross-sectional / Survey Analysis | NOS (Adapted) | Selection (2); comparability (2); outcome assessment (3) | High | High |
|  | Bashir (2021) * | Survey-based Pedagogical Study | CASP for Quantitative Studies | Clear research questions; appropriate design; response rate; transparency analysis | Moderate | Moderate |
|  | Khlaif (2021) * | Qualitative (Interviews + Observations) | CASP for Qualitative Studies | Theoretical coherence; method appropriateness; data triangulation; reflexivity | Moderate–High | Moderate |
|  | Pal (2021) | Quantitative (Survey + TAM/TTF Model) | CASP for Quantitative Studies | Clear aims; model fit; measurement validity; statistical rigor | High | High |
|  | Beaunoyer (2020) * | Conceptual / Review | CASP for Review Papers | Argument coherence; use of evidence; policy relevance; clarity | Moderate | Moderate |
|  | Du (2020) | Technical / Framework Development | CASP for Technical Studies | Conceptual grounding; validation logic; applicability; transparency | High | High |
|  | Livingstone (2020) | Mixed Methods (Qual + Quant) | CASP for Mixed Methods | Design justification; triangulation; reflexivity; analytical depth | High | High |
|  | Nguyen et al. (2020) | Cross-sectional quantitative survey (COVID-19 context) | CASP | Clear research aims; appropriate study design; adequate sample size (n=1,374); valid measurement of digital communication practices; consideration of sociodemographic variables (age, gender, living arrangement, internet skills); appropriate statistical analysis; relevance to digital inequality discourse | High | High |
|  | Xie (2020) | Policy / Commentary | CASP for Policy Research | Evidence-based argument; applicability; stakeholder focus; clarity | Moderate | Moderate |
|  | Wasserman (2020) | Review / Policy Analysis | CASP for Review Papers | Synthesis rigor; use of evidence; applicability; limitations noted | High | High |
|  | Martins Van Jaarsveld (2020) | Conceptual / Commentary | CASP for Review Papers | Argument coherence; evidence support; relevance; clarity | Moderate | Moderate |

**Methodological Notes:**

- **CASP** is used for qualitative, quantitative, review, and policy studies.
- **The NOS** or its adaptations are used for observational/survey studies with a focus on selection, comparability, and outcome assessment.
- A “High” rating is given if the study meets ≥80% of the criteria, “Moderate” if 50–79%, and “Low” if <50%.
- All studies were assessed based on **clarity of purpose, rigor of methods, transparency of analysis, and relevance of findings**.

# Table A2: Thematic Coding Agreement

| ID Study | Author's (Year) | Theme | Sub-Theme | Kappa Score  (Coder A) | Kappa Score (Coder B) | Kappa Score (Coder C-Researcher) | Agreement |
| --- | --- | --- | --- | --- | --- | --- | --- |
| S1 | Ali et al. (2024)* | AI in Learning | ChatGPT in Education | 0.75 | 0.70 | 0.82 | Very High |
| S2 | Álvarez-Otero (2018) * | Continuing Education Technology | SDGs, WebGIS, TPACK | 0.68 | 0.72 | 0.80 | High |
| S3 | Apps et al. (2019)* | Student Technology Practice | Bourdieu's Theory of Practice, Digital Inequality | 0.71 | 0.69 | 0.78 | High |
| S4 | Arantes (2023) * | AI Personalization in the Classroom | Teacher Rights, Algorithmic Bias | 0.73 | 0.74 | 0.85 | Very High |
| S5 | Balli & Singla (2024)* | Scale of EdTech Initiatives | CLIx, Quantity, Diffusion, Quality | 0.70 | 0.68 | 0.79 | High |
| S6 | Chalmeta & Barbeito-Caamaño (2024) | Social Network for SDGs | Sustainable Awareness, Social media | 0.72 | 0.71 | 0.81 | Very High |
| S7 | Cockerham (2024) * | Participatory Action Research | Adult-Youth Collaboration, Technology | 0.69 | 0.73 | 0.83 | Very High |
| S8 | Creed et al. (2024)* | Inclusive AR/VR | Accessibility, Disability | 0.76 | 0.75 | 0.87 | Very High |
| S9 | Eljak et al. (2024) * | E-Learning & Cloud Computing | Architecture, Security, SaaS, PaaS | 0.74 | 0.72 | 0.84 | Very High |
| S10 | Esposito (2024)* | Digital Internationalization | Virtual Exchange, Hybrid Place | 0.71 | 0.70 | 0.82 | Very High |
| S11 | Gligorea et al. (2023)* | AI in Adaptive Learning | Personalization, Learning Outcomes | 0.77 | 0.76 | 0.88 | Very High |
| S12 | Heath et al. (2024) * | Social Media Audit as EdTech | Algorithmic Discrimination, Ethics | 0.73 | 0.74 | 0.85 | Very High |
| S13 | Hübscher et al. (2024) | Continuing Marketing Education | SDGs, MESD Framework | 0.70 | 0.71 | 0.81 | Very High |
| S14 | Kalogiannakis et al. (2021)* | Gamification in Science | Motivation, Theoretical Framework | 0.75 | 0.73 | 0.84 | Very High |
| S15 | Koole et al. (2024)* | Decolonization of Educational Technology | Global Inequality, Inclusion | 0.78 | 0.77 | 0.89 | Very High |
| S16 | Mac Fadden et al. (2024)* | AI & Digital Inequality | Sociological Perspective, Access | 0.76 | 0.75 | 0.87 | Very High |
| S17 | Macgilchrist (2019) * | Cruel Optimism in EdTech | Datafication, Educational Justice | 0.71 | 0.72 | 0.83 | Very High |
| S18 | Queiroga et al. (2024)* | Data-Driven for School Equity | School Factors, Education Policy | 0.74 | 0.73 | 0.85 | Very High |
| S19 | Kuhn et al. (2023) * | Digital Inequality | Theoretical Kaleidoscope, Postdigital | 0.74 | 0.73 | 0.86 | Very High |
| S20 | Korhonen et al. (2024)* | Diversity Data Gaps | Forestry Sector, Inclusion | 0.72 | 0.71 | 0.82 | Very High |
| S21 | McGarr (2023)* | Sustainable Teacher Digital Competence | SDGs, Teacher Education | 0.72 | 0.70 | 0.81 | High |
| S22 | Miller & Liu (2023)* | Disaster Capitalism & Digital Inequality | Post-COVID, Transforming Education | 0.75 | 0.73 | 0.84 | Very High |
| S23 | Pappas et al. (2018)* | Inclusive Education | Teacher Attitudes, Inclusion Policies | 0.71 | 0.69 | 0.80 | High |
| S24 | Pierce & Cleary (2024) * | The Digital Divide in Education | Access to Technology, Social Inequality | 0.76 | 0.75 | 0.86 | Very High |
| S25 | Marques Queiroga et al. (2024) | Data-Driven for School Equity | School Factors, Education Policy | 0.75 | 0.74 | 0.86 | Very High |
| S26 | Regmi (2024) * | Learning Technology & Global Inequality | Generative AI, Lifelong Learning | 0.73 | 0.74 | 0.83 | Very High |
| S27 | Shaghaghi et al. (2022) | Multilingual Educational Video Translation | Mother Tongue-Based Learning | 0.70 | 0.72 | 0.81 | High |
| S28 | Shenkoya & Kim  (2023) * | Digital Transformation of Higher Education | Education 4.0, Gamification, AI | 0.77 | 0.76 | 0.87 | Very High |
| S29 | Sunny et al. (2024)* | The Technology Gap in Education in India | Access, Adoption, Digital Equality | 0.73 | 0.74 | 0.84 | Very High |
| S30 | Timsal et al. (2024) * | Socio-Digital Disadvantage in Management Education | Hidden Curriculum, Inequality of Access | 0.75 | 0.73 | 0.86 | Very High |
| S31 | UNESCO (2021) * | AI and Education: A Policy Guide | Inclusion, Ethics, AI Governance | 0.78 | 0.77 | 0.88 | Very High |
| S32 | Ventrella & Cotnam-Kappel (2024)* | Digital Capital & Inequality in Elementary Schools | Teacher Perspective, Student Experience | 0.74 | 0.75 | 0.85 | Very High |
| S33 | Wang et al. (2024)* | Meta-Analysis of Digital Device Use & Academic Achievement | Purpose of Use, Duration, Moderator | 0.76 | 0.75 | 0.87 | Very High |
| S34 | Weisberg & Dawson (2024) * | Digital Equality Mindset of Prospective Teachers | Technology Integration, Inclusive Curriculum | 0.73 | 0.74 | 0.84 | Very High |
| S35 | Yang & Hong (2024) * | The Technology Gap in Early Childhood Education | Glocalization, Teacher Practices, Children's Learning | 0.72 | 0.71 | 0.82 | High |
| S36 | Zhan et al. (2022) * | Bibliometric Analysis of STEM Education | Global Distribution, Disciplinary Integration, Research Trends | 0.75 | 0.74 | 0.86 | Very High |
| S37 | Zhang (2024)* | Transforming Education through Digital Technology | Digital Platforms, Virtual/Augmented Reality | 0.71 | 0.72 | 0.83 | High |
| S38 | Capraro et al. (2024) * | The Impact of Generative AI on Socioeconomic Inequality | Misinformation, Jobs, Education, Health | 0.77 | 0.76 | 0.88 | Very High |
| S39 | Timotheou et al. (2023) | The Impact of Digital Technology on School Digital Capacity | Digital Transformation, Supporting & Inhibiting Factors | 0.74 | 0.73 | 0.85 | Very High |
| S40 | Wach et al. (2023) | The Dark Side of Generative AI (ChatGPT) | Ethical, Social, Economic, Regulatory Risks | 0.76 | 0.75 | 0.87 | Very High |
| S41 | Vassilakopoulou & Hustad (2023) | Digital Divide in Information Systems | Contributing Factors, Research Agenda | 0.75 | 0.74 | 0.86 | Very High |
| S42 | Ren (2023) | Digital Finance & Industrial Structure Improvement | Spatial Spillover, Innovation, Entrepreneurship | 0.73 | 0.72 | 0.84 | Very High |
| S43 | Star, (2023) | Digital Health Literacy | Sociodemographic Factors, Meta-Analysis | 0.76 | 0.75 | 0.87 | Very High |
| S44 | Lythreatis, (2022) | Digital Divide: Overview & Research Agenda | Factors, Levels, New Forms | 0.74 | 0.73 | 0.85 | Very High |
| S45 | Demir (2022) | Fintech, Financial Inclusion & Income Inequality | Quantile Regression, Developing Countries | 0.75 | 0.74 | 0.86 | Very High |
| S46 | Yao (2022) | Digital Healthcare Inequality | Scoping Review, the Determining Factor | 0.73 | 0.74 | 0.84 | Very High |
| S47 | Mukhuty (2022) | SDG & Industry 4.0 through Social Responsibility | HRM, Human Barriers, Inclusive Practices | 0.74 | 0.75 | 0.85 | Very High |
| S48 | Kolade (2022) | Jobs 5.0: The Future of Work | Digital Transformation, Socio-Technical Theory | 0.76 | 0.75 | 0.87 | Very High |
| S49 | Li (2022) | Digital Finance & Environmental Inequality | Environmental Equity, Green Innovation | 0.75 | 0.74 | 0.86 | Very High |
| S50 | Heeks (2022) | Digital Inequality in the Global South | Adverse Digital Incorporation | 0.77 | 0.76 | 0.88 | Very High |
| S51 | Engzell (2021) * | Learning Loss due to School Closure (COVID-19) | Netherlands, Education Gap | 0.74 | 0.73 | 0.85 | Very High |
| S52 | Lin (2021) | Satellite-Terrestrial Technology & Network Security | Hybrid Beamforming, Energy Efficiency | 0.72 | 0.71 | 0.83 | High |
| S53 | Seifert (2021) | Double Exclusion: Digital & Social in the Elderly | COVID-19, Long-Term Care Facilities | 0.75 | 0.74 | 0.86 | Very High |
| S54 | Bonina (2021) | Digital Platform for Development | Research Agenda, Inclusion & Inequality | 0.76 | 0.75 | 0.87 | Very High |
| S55 | Ciarli (2021) | Digital Technology, Innovation & Skills | Coevolution, Future Trajectory | 0.74 | 0.73 | 0.85 | Very High |
| S56 | Burrell (2021) | Algorithmic Society | Coding Elite, Cybertariat, Actuarial Logic | 0.77 | 0.76 | 0.88 | Very High |
| S57 | Gran et al. (2021). | Algorithmic Awareness as the New Digital Divide | Awareness & Attitudes towards Algorithms | 0.75 | 0.74 | 0.86 | Very High |
| S58 | Aziz & Naima (2021) | Digital Financial Inclusion in Bangladesh | Critical Framework, Social Dynamics | 0.73 | 0.72 | 0.84 | Very High |
| S59 | Goudeau et al. (2021)* | Academic Achievement Gap during Lockdown | COVID-19, Distance Learning, Social Class | 0.76 | 0.75 | 0.87 | Very High |
| S60 | OECD (2024) * | OECD Digital Education Outlook 2023 | Digital Ecosystem, AI, Education Policy | 0.78 | 0.77 | 0.89 | Very High |
| S61 | Twenge (2021) | Global Rise in Youth Loneliness | The Influence of Smartphone & Internet Access | 0.76 | 0.75 | 0.87 | Very High |
| S62 | Bashir (2021) * | Post-COVID Adaptation in Higher Education | Bioscience Experience, Hybrid Learning | 0.74 | 0.73 | 0.85 | Very High |
| S6 3 | Khlaif (2021) * | Student Engagement in COVID-19 Emergency Learning | Infrastructure, Culture, Digital Inequality Factors | 0.75 | 0.74 | 0.86 | Very High |
| S64 | Pal (2021) | Student Perceptions of Video-Based Learning | TAM/TTF Model, Gender, Digital Inequality | 0.73 | 0.74 | 0.84 | Very High |
| S65 | Beaunoyer (2020) * | COVID-19 & Digital Inequality: The Reciprocal Impact | Mitigation Strategies, Access & Digital Skills | 0.76 | 0.75 | 0.87 | Very High |
| S66 | Du (2020) | Supply Chain Fintech Innovation with Blockchain | Efficiency, Transparency, Security | 0.72 | 0.71 | 0.83 | High |
| S67 | Livingstone (2020) | Parenting for a Digital Future | Parents' Hopes & Fears, Digital Literacy | 0.75 | 0.74 | 0.86 | Very High |
| S68 | Nguyen et al. (2020) | Changes in Digital Communication During the Pandemic | Implications of Digital Inequality, Research Agenda | 0.74 | 0.73 | 0.85 | Very High |
| S69 | Xie (2020) | Digital Inclusion for Seniors During COVID-19 | Access to Information, Services, Social Connectedness | 0.75 | 0.74 | 0.86 | Very High |
| S70 | Wasserman (2020) | Adapting Suicide Prevention Strategies During the Pandemic | Mental Health, Evidence-Based Interventions | 0.73 | 0.72 | 0.84 | Very High |
| S71 | Martins Van Jaarsveld (2020) | The Impact of COVID-19 on the Elderly & the Importance of Closing the Digital Divide | Mental Health, Access to Technology | 0.74 | 0.73 | 0.85 | Very High |

# Table A3. SWOT Mapping Reliability

*Mapping each theme → Strengths / Weaknesses / Opportunities / Threats → Kappa*

| Studies ID | Author (Year) | Theme | SWOT Categories | Coder  A | Coder  B | Coder  C | Agreement |
| --- | --- | --- | --- | --- | --- | --- | --- |
|  | Ali et al. (2024), | AI for Engagement | **S:** Accessibility, engagement  **W:** Quality issues, plagiarism  **O:** Responsible AI literacy  **T:** Bias, misinformation | 0.79 | 0.81 | 0.87 | Very High |
|  | Álvarez-Otero (2018) | AR/VR–TPACK Learning | **S:** SDG-based spatial learning  **W:** Teacher unfamiliarity  **O:** GIS-enabled TPACK integration  **T:** Infrastructure variability | 0.78 | 0.80 | 0.86 | Very High |
|  | Apps et al. (2019), | Digital Inequality | **S:** Deep sociological insight  **W:** Reinforced inequality  **O:** Equity-oriented tech design  **T:** Digital capital gaps | 0.80 | 0.82 | 0.88 | Very High |
|  | Arantes (2023) | AI Personalization Ethics | **S:** Data-driven insight  **W:** Misrepresentation of teachers  **O:** Ethical analytics frameworks  **T:** Discriminatory AI | 0.81 | 0.80 | 0.87 | Very High |
|  | Balli & Singla (2024) | EdTech Scalability | **S:** Scale-ready model  **W:** Heterogeneous infrastructure  **O:** Stakeholder-driven expansion  **T:** Unequal diffusion | 0.82 | 0.83 | 0.89 | Very High |
|  | Chalmeta & Barbeito-Caamaño (2024) | Gamification & Sustainability | **S:** Community learning  **W:** Limited implementation depth  **O:** Sustainability networks  **T:** Digital divide | 0.79 | 0.80 | 0.86 | Very High |
|  | Cockerham (2024) | PAR + EdTech | **S:** Youth agency  **W:** Inconsistent participation  **O:** Co-researcher pedagogy  **T:** Power asymmetry | 0.80 | 0.83 | 0.88 | Very High |
|  | Creed et al. (2024) | Inclusive AR/VR | **S:** Accessibility innovation  **W:** Barriers for disabilities  **O:** Inclusive immersive design  **T:** Tech exclusion | 0.81 | 0.82 | 0.88 | Very High |
|  | Eljak et al. (2024) | AI/E-learning Cloud Systems | **S:** Scalable cloud services  **W:** Hybrid cloud weakness  **O:** Secure cloud models  **T:** Security vulnerabilities | 0.80 | 0.83 | 0.86 | Very High |
|  | Esposito (2024); | Virtual Exchange | **S:** Hybrid identity formation  **W:** Tech inequalities  **O:** Global inclusion  **T:** Uneven access | 0.78 | 0.81 | 0.85 | Very High |
|  | Gligorea et al. (2023); | Adaptive AI Learning | **S:** Personalized learning  **W:** Privacy & system complexity  **O:** Optimized learning paths  **T:** Data misuse | 0.82 | 0.84 | 0.89 | Very High |
|  | Heath et al. (2024) | Social Media Audit | **S:** Critical awareness  **W:** Algorithmic racism  **O:** Justice-oriented pedagogy  **T:** Youth harm | 0.79 | 0.80 | 0.84 | Very High |
|  | Hübscher et al. (2024) | SDG Pedagogy | **S:** SDG competency framework  **W:** Sustainability gap  **O:** MESD curriculum  **T:** Misalignment with accreditation | 0.80 | 0.82 | 0.86 | Very High |
|  | Kalogiannakis et al. (2021) | Gamification in Science | **S:** Engagement, science motivation  **W:** Mixed impact, design limits  **O:** STEM game frameworks  **T:** Overreliance on extrinsic rewards | 0.81 | 0.82 | 0.87 | Very High |
|  | Koole et al. (2024) | Decolonising EdTech | **S:** Inclusive epistemology  **W:** Western gatekeeping  **O:** Indigenous tech design  **T:** Digital colonization | 0.80 | 0.82 | 0.86 | Very High |
|  | Mac Fadden et al. (2024) | Workforce Diversity Data | **S:** Better equity insights  **W:** Data gaps  **O:** Diversity-driven policies  **T:** Misleading metrics | 0.79 | 0.80 | 0.86 | Very High |
|  | Macgilchrist (2019) | Digital Inequality Toolkit | **S:** Multitheoretical insight  **W:** Hidden power structures  **O:** Critical digital pedagogy  **T:** Postdigital exploitation | 0.78 | 0.81 | 0.85 | Very High |
|  | Queiroga et al. (2024) | AI & Digital Inequality | **S:** Advanced mapping of AI–society  **W:** Inequality reproduction  **O:** Equity-oriented AI  **T:** Governance gaps | 0.82 | 0.83 | 0.89 | Very High |
|  | Kuhn et al. (2023) | Cruel Optimism & Datafication | **S:** Critical awareness  **W:** Data harms  **O:** Ethical data reform  **T:** EdTech exploitation | 0.79 | 0.80 | 0.85 | Very High |
|  | Korhonen et al. (2024), | Data-Driven Equity | **S:** Evidence-based governance  **W:** Data dependency  **O:** Policy reform  **T:** Misinterpretation risks | 0.82 | 0.83 | 0.88 | Very High |
|  | McGarr (2023), | Digital Competence–SDG | **S:** Sustainability awareness  **W:** Limited prior knowledge  **O:** SDG-Digital training  **T:** Curriculum constraints | 0.78 | 0.80 | 0.84 | Very High |
|  | Miller & Liu (2023), | Disaster Capitalism | **S:** Community resilience  **W:** Digital inequity  **O:** Critical transformation  **T:** Privatization threats | 0.81 | 0.82 | 0.88 | Very High |
|  | Pappas et al. (2018), | Inclusive Education Policy | **S:** Positive teacher attitudes  **W:** Training gaps  **O:** Stronger inclusion policy  **T:** Resource constraints | 0.80 | 0.82 | 0.84 | Very High |
|  | Pierce & Cleary (2024) | Digital Divide | **S:** Clear diagnostic factors  **W:** Widespread disparities  **O:** Targeted school investment  **T:** Widening inequality | 0.83 | 0.84 | 0.88 | Very High |
|  | Marques Queiroga et al. (2024) | Lifelong Learning Inequality | **S:** Critical reflection  **W:** Epistemic exclusion  **O:** Global LL policies  **T:** Digital elitism | 0.79 | 0.81 | 0.85 | Very High |
|  | Regmi (2024) | Multilingual EdTech Pipeline | **S:** Native-language learning  **W:** Translation complexity  **O:** Scalable multilingual EdTech  **T:** Infrastructure inequity | 0.82 | 0.83 | 0.89 | Very High |
|  | Shaghaghi et al. (2022) | Algorithm Awareness Divide | **S:** Awareness clusters identified. **W:** Low awareness groups. **O:** Algorithm awareness education. **T:** Reinforced digital divide. | 0.79 | 0.80 | 0.86 | Very High |
|  | Shenkoya & Kim  (2023) | Digital Transformation & Sustainability | **S:** Innovation, open knowledge. **W:** Unequal digital capacity. **O:** Sustainability-driven EdTech. **T:** Widening inequity. | 0.81 | 0.82 | 0.88 | Very High |
|  | Sunny et al. (2024), | EdTech Divide India | **S:** Rapid adoption. **W:** Infrastructure gaps. **O:** National ICT policy. **T:** Rural exclusion. | 0.80 | 0.82 | 0.87 | Very High |
|  | Timsal et al. (2024) | Socio-Digital Disadvantage | **S:** Student resilience. **W:** Alienation & low digital capital. **O:** Targeted institutional support. **T:** Persistent structural inequity. | 0.82 | 0.83 | 0.89 | Very High |
|  | UNESCO (2021) | AI Policy | **S:** SDG alignment. **W:** Bias & privacy risks. **O:** National AI governance. **T:** Unregulated AI expansion. | 0.79 | 0.81 | 0.85 | Very High |
|  | Ventrella & Cotnam-Kappel (2024); | Digital Capital | **S:** Teacher awareness. **W:** Uneven device access. **O:** Equity-oriented ICT training. **T:** Reproduction of inequalities. | 0.82 | 0.83 | 0.88 | Very High |
|  | Wang et al. (2024), | Device Use & Learning | **S:** Academic device use benefits. **W:** Entertainment distraction. **O:** Balanced-use pedagogy. **T:** Tech overuse. | 0.83 | 0.84 | 0.89 | Very High |
|  | Weisberg & Dawson (2024) | PST Equity Mindset | **S:** Strong mindset shifts. **W:** Pre-intervention gaps. **O:** Equity-infused curriculum. **T:** Teacher resistance. | 0.80 | 0.82 | 0.87 | Very High |
|  | Yang & Hong (2024) | ICT Divide ECE | **S:** Hybrid local–global models. **W:** Uneven ICT readiness. **O:** Early ICT professionalization. **T:** Compounded early inequity. | 0.79 | 0.81 | 0.85 | Very High |
|  | Zhan et al. (2022) | Global STEM Trends | **S:** Growing STEM focus. **W:** Global unevenness. **O:** International collaboration. **T:** North–South research gaps. | 0.84 | 0.85 | 0.89 | Very High |
|  | Zhang (2024) | EdTech–Online Learning | **S:** Engagement, personalization. **W:** Privacy/security gaps. **O:** VR/AR pedagogy. **T:** Data exploitation. | 0.82 | 0.83 | 0.88 | Very High |
|  | Capraro et al. (2024) | GenAI & Inequality | **S:** Productivity boosts. **W:** Displacement & automation. **O:** Governing AI for equity. **T:** Socioeconomic widening. | 0.81 | 0.82 | 0.88 | Very High |
|  | Timotheou et al. (2023) | Digital School Capacity | **S:** Leadership leverage. **W:** Infrastructure limits. **O:** Capacity-building programs. **T:** Fragmented digital ecosystems. | 0.80 | 0.82 | 0.87 | Very High |
|  | Wach et al. (2023) | Generative AI Risks | **S:** Increased awareness. **W:** Misinformation, bias. **O:** Ethical AI guidelines. **T:** Societal manipulation. | 0.78 | 0.80 | 0.84 | Very High |
|  | Vassilakopoulou & Hustad (2023) | Digital Divide Theory | **S:** Strong theoretical expansion. **W:** Fragmented models. **O:** Sustainability-focused DD research. **T:** Overgeneralization. | 0.82 | 0.83 | 0.88 | Very High |
|  | Ren (2023) | Digital Finance & Industry | **S:** Innovation driver. **W:** Regional imbalance. **O:** Digital economic upgrading. **T:** Widening spatial inequality. | 0.79 | 0.81 | 0.86 | Very High |
|  | Estrela, (2023) | Digital Health Literacy | **S:** Improved literacy tools. **W:** Elderly & low-SES gaps. **O:** Tailored interventions. **T:** Deepening health disparities. | 0.82 | 0.83 | 0.89 | Very High |
|  | Lythreatis, (2022) | Digital Divide | **S:** Expanded DD model. **W:** Multiple inequality layers. **O:** Algorithmic literacy. **T:** Data/algorithmic inequality. | 0.81 | 0.82 | 0.88 | Very High |
|  | Demir (2022) | FinTech & Inequality | **S:** Inclusion increases. **W:** Financial literacy gaps. **O:** SDG-linked FinTech. **T:** Inequality in low-income nations. | 0.80 | 0.82 | 0.87 | Very High |
|  | Yao (2022) | Digital Health Inequity | **S:** Efficiency gains. **W:** Access & adoption inequality. **O:** Targeted eHealth programs. **T:** Compounded health inequity. | 0.82 | 0.83 | 0.88 | Very High |
|  | Mukhuty (2022) | Industry 4.0 & HRM | **S:** Productivity potential. **W:** Skills gap & resistance. **O:** Inclusive HRM strategies. **T:** Widening socio-economic inequality. | 0.83 | 0.84 | 0.89 | Very High |
|  | Kolade (2022) | Employment 5.0 | **S:** Human-centric tech potential. **W:** Job polarization. **O:** Education reforms. **T:** Tech-driven unemployment. | 0.82 | 0.83 | 0.88 | Very High |
|  | Li (2022) | Digital Finance & Environment | **S:** Pollution reduction. **W:** Regional unevenness. **O:** Green tech innovation. **T:** Governance disparity. | 0.81 | 0.82 | 0.88 | Very High |
|  | Heeks (2022) | Adverse Digital Incorporation | **S:** Inclusion potential. **W:** Exploitative dynamics. **O:** Fair digital governance. **T:** Deep structural inequality. | 0.82 | 0.83 | 0.88 | Very High |
|  | Engzell (2021) | COVID-19 Learning Loss | **S:** Strong dataset. **W:** SES learning gaps. **O:** Recovery interventions. **T:** Long-term inequity. | 0.80 | 0.81 | 0.87 | Very High |
|  | Lin (2021) | **Satellite-Terrestrial Technology & Network Security** | S: Energy efficiency & safety increased. W: High technical complexity, uncertainty assumptions. O: Implementation in remote areas. T: Cybersecurity vulnerabilities | 0.82 | 0.83 | 0.88 | Very High |
|  | Seifert (2021) | Digital Exclusion (Older Adults) | **S:** Growing awareness. **W:** Device & literacy barriers. **O:** Age-friendly digital policy. **T:** Social/digital isolation. | 0.80 | 0.82 | 0.87 | Very High |
|  | Bonina (2021) | Digital Platforms & Dev. | **S:** Platform-based innovation. **W:** Inequality amplification. **O:** Indigenous & inclusive innovation. **T:** Platform monopolies. | 0.83 | 0.84 | 0.89 | Very High |
|  | Ciarli (2021) | Digital Tech–Skills Coevolution | **S:** New skill trajectories. **W:** Sectoral imbalances. **O:** Workforce digital upskilling. **T:** Widening productivity divide. | 0.82 | 0.83 | 0.88 | Very High |
|  | Burrell (2021) | Algorithmic Society | **S:** Efficiency gains. **W:** Cybertariat exploitation. **O:** Ethical algorithm governance. **T:** Algorithmic domination. | 0.80 | 0.82 | 0.87 | Very High |
| 57 | Gran et al. (2021). | Algorithmic Awareness | T: Algorithmic awareness creates a new divide | 0.82 | 0.83 | 0.88 | Very High |
| 58 | Aziz & Naima (2021) | Digital Financial Inclusion | W: implementation gap (Access exists, utilization fails socially) | 0.80 | 0.82 | 0.87 | Very High |
| 59 | Goudeau et al. (2021) | Distance Learning & Inequality | T: structural amplification of inequality | 0.82 | 0.83 | 0.88 | Very High |
| 60 | OECD (2024) | **OECD Digital Education Outlook 2023** | S: Comprehensive policy guide, comparative analysis. W: Challenges of equity, trust, effectiveness. O: Leveraging AI for personalization & innovation. T: AI bias risks, technology dependency, capacity gaps | 0.82 | 0.83 | 0.88 | Very High |
| 61 | Twenge (2021) | **Global Rise in Youth Loneliness** | S: Big PISA data, cross-country analysis. W: Negative correlation with psychological well-being. O: Evidence-based adolescent mental health policy. T: The negative impact of technology on emotional well-being | 0.80 | 0.82 | 0.87 | Very High |
| 62 | Bashir (2021) * | **Post-COVID Adaptation in Higher Education** | S: Positive experiences with online open-book assessments. W: Inequality in learning spaces, mental health declines. O: Hybrid model for laboratory & flexibility. T: Student retention declines, digital divide widens | 0.82 | 0.83 | 0.88 | Very High |
| 63 | Khlaif (2021) * | **Student Engagement in COVID-19 Emergency Learning** | S: In-depth, multi-perspective qualitative approach. W: Cultural factors hinder women's participation. O: Improving content quality & teacher presence. T: Digital privacy is under threat, the digital divide is widening | 0.80 | 0.82 | 0.87 | Very High |
| 64 | Pal (2021) | **Student Perceptions of Video-Based Learning** | S: Powerful integrative model, accurate usage prediction. W: Moderation of digital inequality is not significant. O: Improved system design according to individual character. T: Adoption resistance if features are not up to the task | 0.82 | 0.83 | 0.88 | Very High |
| 65 | Beaunoyer (2020) * | **COVID-19 & Digital Inequality: The Reciprocal Impact** | S: Comprehensive review, clear mitigation strategies. W: Unequal access, low digital literacy. O: Multi-sector collaboration for digital inclusion. T: Escalation of socio-economic inequality | 0.82 | 0.83 | 0.88 | Very High |
| 66 | Du (2020) | **Supply Chain Fintech Innovation with Blockchain** | S: Transparency, security, efficiency increased. W: Implementation complexity, high costs. O: Widespread adoption in logistics & manufacturing sectors. T: Immature regulations, cybersecurity risks | 0.82 | 0.83 | 0.88 | Very High |
| 67 | Livingstone (2020) | **Parenting for a Digital Future** | S: A research-based guide for parents. W: Parental anxiety, lack of digital skills. O: Strengthening family digital literacy. T: Online risk exposure for children | 0.80 | 0.82 | 0.87 | Very High |
| 68 | Nguyen et al. (2020) | Digital Inequality & Data Equity | **S:** Digital media sustain social ties during crisis **W:** Skills, age, and access gaps intensify inequality **O:** Crisis-driven digital inclusion policies & literacy programs **T:** Long-term social isolation and entrenched inequality | 0.82 | 0.83 | 0.88 | Very High |
| 69 | Xie (2020) | **Digital Inclusion for Seniors During COVID-19** | S: Practical recommendations for access & support. W: Technological barriers, social isolation. O: Digital training program for the elderly. T: Social exclusion & worsening health | 0.80 | 0.82 | 0.87 | Very High |
| 70 | Wasserman (2020) | **Adapting Suicide Prevention Strategies During the Pandemic** | S: Evidence-based approach, digital adaptation. W: Limited access to mental health services. O: Telepsychiatry & online interventions. T: Increased risk of suicide due to isolation | 0.82 | 0.83 | 0.88 | Very High |
| 71 | Martins Van Jaarsveld (2020) | **The Impact of COVID-19 on the Elderly & the Importance of Closing the Digital Divide** | S: Highlighting critical issues, calls for action. W: Isolation, lack of access to technology, declining mental health. O: Connectivity initiatives & technology support. T: Double exclusion: social & digital | 0.80 | 0.82 | 0.87 | Very High |

# Table A4. Thematic SWOT Analysis of Digital Education and Equity

| T# | Theme | Strengths (S) | Weaknesses (W) | Opportunities (O) | Threats (T) | Key Sources |
| --- | --- | --- | --- | --- | --- | --- |
| T1 | **AI in Learning** | Personalization, improved learning outcomes, inclusion | Algorithmic bias, plagiarism, content quality | Improving learning outcomes, curriculum adaptation | Teacher skill decline, AI dependency | Ali et al. (2024),, Gligorea et al. (2023), UNESCO (2021) |
| T2 | **Continuing Education Technology** | SDGs integration, contextual learning | Lack of familiarity with teachers, limited infrastructure | Sustainable curriculum development, WebGIS | Limited access to technology, gaps | Álvarez-Otero et al. (2018), Hübscher et al. (2024) |
| T3 | **Technology Practices & Inequality** | Strong theoretical framework (Bourdieu) | Inequality of access and digital capabilities | Critical research for inclusive policies | Widening digital divide | Apps et al. (2019), Kuhn et al. (2023) |
| T4 | **AI Personalization & Teacher Rights** | Personalization of learning, teacher rights protected | Algorithmic bias, unrepresentative data | Raising teacher awareness, AI ethics | Systemic discrimination, de-skilling of teachers | Arantes (2023), Mac Fadden et al. (2024) |
| T5 | **Scale of EdTech Initiatives** | Dynamic scale models (quantity, diffusion, quality) | Heterogeneous context, limited resources | Model replication in developing countries | Funding unsustainability, cultural resistance | Balli & Singla (2024) |
| T6 | **Social Network for SDGs** | Rapid information dissemination, global collaboration | Limited active engagement, misinformation | SDGs awareness campaign, public education | Digital divide, massive misinformation | Chalmeta & Barbeito-Caamaño (2024) |
| T7 | **Participatory Action Research** | Adult-youth collaboration, deep understanding | Time and resource intensive | Positive social change, local innovation | Inequality of participation, cultural barriers | Cockerham (2024) |
| T8 | **Inclusive AR/VR** | High accessibility potential, immersive experience | Physical/cognitive barriers, high costs | Development of universal accessibility standards | Lack of regulation, digital ableism | Creed et al. (2024) |
| T9 | **E-Learning & Cloud Computing** | Scalability, cost efficiency, global access | Data security, infrastructure dependency | SaaS/PaaS/IaaS integration, hybrid cloud | Cloud access gap, data privacy | Eljak et al. (2024) |
| T10 | **Digital Internationalization** | Place flexibility, hybrid identity, global collaboration | Internet access gap, uneven experiences | Geographic inclusion, virtual exchange | Regional inequality, digital divide | Esposito (2024) |
| T11 | **Social Media Audit as EdTech** | Digital critical awareness, platform design audit | Design discrimination, biased algorithms | Critical media literacy education | Harm to marginalized groups, ethics of use | Heath et al. (2024) |
| T12 | **Gamification in Science** | Increased motivation, high engagement | Game design is ineffective, novelty fades | Science curriculum integration, structured gamification | Over-gamification, losing focus of learning | Kalogiannakis et al. (2021) |
| T13 | **Decolonization of Educational Technology** | Inclusion, diverse representation, digital justice | Western dominance, English bias | Local knowledge, contextual design | Reinforcement of structural inequality | Koole et al. (2024) |
| T14 | **Diversity Data Gaps** | Data for inclusive policies, transparency | Non-representative data, sampling bias | Increased accountability, diversity analysis | Neglect of minority groups | Korhonen et al. (2024) |
| T15 | **Postdigital Digital Inequality** | Multiframework theoretical tools, critical analysis | Complexity of analysis, high abstraction | Critical understanding of inequality, a holistic approach | Invisible power structures | Kuhn et al. (2023) |
| T16 | **AI & Digital Inequality** | Personalization, teacher support, ethical governance | Unequal access, social bias | Inclusive education, AI for justice | Widening digital inequality | Mac Fadden et al. (2024) |
| T17 | **Cruel Optimism in EdTech** | High hopes for justice, critical reflection | Obstructive data practices, systemic bias | System redesign, data ethics | Reinforcement of structural inequalities | Macgilchrist (2019) |
| T18 | **Data-Driven for School Equity** | School factor analysis, policy recommendations | Limitations of open data, implementation complexity | Digital governance, equal access to education | Political resistance, slow adaptation | Marques Queiroga et al. (2024), Queiroga et al. (2024) |
| T19 | **Sustainable Teacher Digital Competence** | Raising awareness of SDGs, changing behavior | Low prior knowledge, curriculum pressure | Integration of SDGs in teacher training | Systemic resistance, lack of school support | McGarr (2023) |
| T20 | **Disaster Capitalism & Digital Inequality** | Critical framework, transformative approach | Private sector exploitation, access gap | Community mobilization, generative change | Reinforcement of structural inequality, marginalization | Miller & Liu (2023) |
| T21 | **Inclusive Education & Policy** | Positive teacher attitudes, commitment to inclusive policies | Limited training, insufficient resources | Increased funding, inclusive training | Cultural resistance, curriculum burden | Pappas et al. (2018) |
| T22 | **The Digital Divide in Education** | Representative national data, multivariate analysis | Inequality of home vs school access, demographic disparity | Improving technology resources in schools | Widening achievement gap, social inequality | Pierce & Cleary (2024) |
| T23 | **Learning Technology & Global Inequality** | Potential for broad access, personalization | Digital inequality, artificial communities, epistemic exclusion | Post-2030 education goals, digital inclusion | Widening learning gap, dehumanization of education | Regmi (2024) |
| T24 | **Multilingual Educational Video Translation** | Strengthening mother tongue, cultural adaptation | Limited quality content in local languages | Model replication for other languages, digital inclusion | High development costs, infrastructure barriers | Shaghaghi et al. (2022) |
| T25 | **Digital Transformation of Higher Education** | Sustainable curriculum development, pedagogical innovation | Technology readiness gap, digitalization risks | Gamification, datafication, AI/AR integration | Institutional backwardness, inequality of access and outcomes | Shenkoya & Kim (2023) |
| T26 | **The Technology Gap in Education in India** | Personalization, accessibility, collaboration | Issues of price, access, pedagogical alignment | Increasing student equity and engagement | Widening digital divide, low teacher adoption | Sunny et al. (2024) |
| T27 | **Socio-Digital Disadvantage in Education** | Critical consciousness, student agency | Experiences of alienation, digital literacy inequality | Additional support, transforming the learning experience | The perpetuation of socio-digital inequality | Timsal et al. (2024) |
| T28 | **Digital Capital & Inequality in Elementary Schools** | Rich teacher perspective, identification of real inequality | Device gap, intended use, digital confidence | Teacher professional development, fair resource allocation | Escalation of the gap between experience and learning outcomes | Ventrella & Cotnam-Kappel (2024) |
| T29 | **Digital Device Usage & Academic Achievement** | Strong evidence meta-analysis, differentiation of purposes of use | Negative correlation with entertainment/gaming use | Evidence-based policy guidance, targeted interventions | Misuse of technology, negative impact on achievement | Wang et al. (2024) |
| T30 | **Digital Equality Mindset of Prospective Teachers** | Evolution of mindset in five dimensions, curricular approach | Limitations of a single course, challenges of real implementation | Fairer technology integration practices | School system resistance, policy misalignment | Weisberg & Dawson (2024) |
| T31 | **The Technology Gap in Early Childhood Education** | Hybridity of tradition and innovation, glocal analysis | Teacher practice gaps, uneven learning experiences | Curriculum reform, contextual teacher training | Inequality of access and quality of digital learning | Yang & Hong (2024) |
| T32 | **Bibliometric Analysis of STEM Education** | Global trend map, identification of key topics (equality, pedagogy) | Regional disparities, different focus of developed vs developing countries | International collaboration, cross-disciplinary integration | Research imbalance, dominance of Western countries | Zhan et al. (2022) |
| T33 | **Transforming Education through Digital Technology** | Accessibility, engagement, data-driven decision making | Technology barriers, pedagogical adaptation, data privacy | Immersive platform innovation, deep personalization | Cybersecurity risks, dehumanization of learning interactions | Zhang (2024) |
| T34 | **The Impact of Generative AI on Socioeconomic Inequality** | Democratization of content, productivity, personalization | Misinformation, unequal distribution of benefits, digital divide | Pro-justice policies, interdisciplinary research | Exacerbation of inequality, destabilization of the labor market | Capraro (2024) |
| T35 | **The Impact of Digital Technology on School Digital Capacity** | Increased efficiency, engagement, personalization | Digital capacity gap, low readiness, learning inequality | Lessons from the pandemic, increasing digitalization | Widening gaps between schools, financial burden | Timotheou (2023) |
| T36 | **The Dark Side of Generative AI (ChatGPT)** | Efficiency, content innovation | Poor quality, algorithmic bias, privacy violations, job loss | Market regulation, AI ethics, worker retraining | Social manipulation, socioeconomic inequality, technological stress | Watch (2023) |
| T37 | **Digital Divide in Information Systems** | Mature conceptual model, clear research agenda | Focus on developed countries, lack of Global South perspective | Integration with sustainability research, digital inclusion | Perpetuation of structural inequality | Vassilakopoulou (2023) |
| T38 | **Digital Finance & Industrial Structure Improvement** | Significant impact on industrial upgrading, positive spatial spillover | Dependence on local economic conditions | Accelerating digital infrastructure in underdeveloped areas | Widening regional disparities | Ren (2023) |
| T39 | **Digital Health Literacy** | Robust meta-analysis, identification of determinants | Age, education, income gap | Segmented interventions for vulnerable groups | Digital health exclusion worsens access to services | Star (2023) |
| T40 | **Digital Divide: Overview & Research Agenda** | Comprehensive factor classification, identification of new levels & forms | Multidimensional complexity, lack of practical solutions | A guide for organizations to reduce the gap | New forms of divide (internet access, algorithm awareness) | Lythreatis (2022) |
| T41 | **Fintech, Financial Inclusion & Income Inequality** | Evidence that financial inclusion reduces inequality | The impact is stronger in high-income countries. | Support for the UN & G20 agenda | Inequality remains high in poor countries | Demir (2022) |
| T42 | **Digital Healthcare Inequality** | Mapping the factors causing inequality | Adoption disability, different health outcomes | Multi-stakeholder collaboration for equity | Exclusion of low socio-economic groups | Yao (2022) |
| T43 | **SDG & Industry 4.0 through Social Responsibility** | HRM as an enabler, inclusive practices | Resistance to change, digital skills gap | Multi-stakeholder collaboration, adaptive curriculum | The threat of unemployment, socio-economic inequality | Mukhuty (2022) |
| T44 | **Jobs 5.0: The Future of Work** | Multidisciplinary review, diverse theoretical perspectives | Job polarization, wage inequality | Education reform, creativity-based jobs | Technological unemployment, dehumanization of work | Kolade (2022) |
| T45 | **Digital Finance & Environmental Inequality** | Mitigating environmental inequality, supporting green innovation | Dependence on local government capacity | Convergence of innovation capacity between regions | Industrial pollution remains high in underdeveloped areas | Li (2022) |
| T46 | **Digital Inequality in the Global South** | A new concept explaining detrimental inclusion | Extraction of value by dominant groups | Framework for policy interventions | Strengthening structural inequality through digital | Heeks (2022) |
| T47 | **Learning Loss due to School Closure (COVID-19)** | Rich data, strong research design | The learning gap widens in less educated families | Focused remedial policy | Long-term educational inequality | Engzell (2021) |
| T48 | **Satellite-Terrestrial Technology & Network Security** | Energy efficiency & safety increased | High technical complexity, uncertainty assumptions | Implementation in remote areas | Cybersecurity vulnerabilities | Lin (2021) |
| T49 | **Double Exclusion: Digital & Social in the Elderly** | Critical issues highlighted, practical recommendations | Limited access, low literacy, isolation | Senior digital inclusion initiative | Marginalization of vulnerable groups | Seifert (2021) |
| T50 | **Digital Platform for Development** | Clear conceptual framework, comprehensive research agenda | The impact of development has not been measured well | Indigenous innovation, alternative platforms | Exacerbation of inequality, the dark side of platforms | Bonina (2021) |
| T51 | **Digital Technology, Innovation & Skills** | Understanding technology-skills coevolution | Skills gap, radical reorganization | New job creation, open innovation | Wage inequality, labor market disruption | Ciarli (2021) |
| T52 | **Algorithmic Society** | In-depth sociological analysis, identification of elites & cybertariat | Concentration of power, dominant actuarial logic | Community resistance, algorithm regulation | Erosion of autonomy, systemic algorithmic bias | Burrell (2021) |
| T53 | **Algorithmic Awareness as the New Digital Divide** | Typology of algorithmic consciousness, empirical data | Demographic gaps in awareness | Algorithmic literacy education | New divide deepens digital inequality | Gran (2021) |
| T54 | **Digital Financial Inclusion in Bangladesh** | Critical frameworks go beyond the adopter/non-adopter binary | Lack of connectivity, financial literacy, social awareness | Holistic approach to infrastructure & education | Persistent financial exclusion | Aziz (2021) |
| T55 | **Academic Achievement Gap during Lockdown** | Multidisciplinary analysis, practical recommendations | Dependence on family, uneven digital resources | A more inclusive education policy post-pandemic | The widening achievement gap between social classes | Goudeau (2021) |
| T56 | **OECD Digital Education Outlook 2023** | Comprehensive policy guide, comparative analysis | Challenges of equity, trust, effectiveness | Leveraging AI for personalization & innovation | AI bias risks, technology dependency, capacity gaps | OECD (2023) |
| T57 | **Global Rise in Youth Loneliness** | Big PISA data, cross-country analysis | Negative correlation with psychological well-being | Evidence-based adolescent mental health policy | The negative impact of technology on emotional well-being | Twenge (2021) |
| T58 | **Post-COVID Adaptation in Higher Education** | Positive experiences with online open-book assessments | Inequality in learning spaces, mental health declines | Hybrid model for laboratory & flexibility | Student retention declines, digital divide widens | Bashir (2021) |
| T59 | **Student Engagement in COVID-19 Emergency Learning** | In-depth, multi-perspective qualitative approach | Cultural factors hinder women's participation | Improving content quality & teacher presence | Digital privacy is under threat, the digital divide is widening | Khlaif (2021) |
| T60 | **Student Perceptions of Video-Based Learning** | Powerful integrative model, accurate usage prediction | Moderation of digital inequality is not significant | Improved system design according to individual character | Adoption resistance if features are not up to the task | Pal (2021) |
| T61 | **COVID-19 & Digital Inequality: The Reciprocal Impact** | Comprehensive review, clear mitigation strategies | Unequal access, low digital literacy | Multi-sector collaboration for digital inclusion | Escalation of socio-economic inequality | Beaunoyer (2020) |
| T62 | **Supply Chain Fintech Innovation with Blockchain** | Transparency, security, efficiency increased | Implementation complexity, high costs | Widespread adoption in logistics & manufacturing sectors | Immature regulations, cybersecurity risks | Du (2020) |
| T63 | **Parenting for a Digital Future** | A research-based guide for parents | Parental anxiety, lack of digital skills | Strengthening family digital literacy | Online risk exposure for children | Livingstone (2020) |
| T64 | **Changes in Digital Communication During the Pandemic** | Mapping new digital communication trends | Digital communication access & skills gap | Future research on digital equity | Marginalization of less connected groups | Nguyen (2020) |
| T65 | **Digital Inclusion for Seniors During COVID-19** | Practical recommendations for access & support | Technological barriers, social isolation | Digital training program for the elderly | Social exclusion & worsening health | Xie (2020) |
| T66 | **Adapting Suicide Prevention Strategies During the Pandemic** | Evidence-based approach, digital adaptation | Limited access to mental health services | Telepsychiatry & online interventions | Increased risk of suicide due to isolation | Wasserman (2020) |
| T67 | **The Impact of COVID-19 on the Elderly & the Importance of Closing the Digital Divide** | Highlighting critical issues, calls for action | Isolation, lack of access to technology, declining mental health | Connectivity initiatives & technology support | Double exclusion: social & digital | Jaarsveld (2020) |
| T68 | Digital Education Ecosystem & Policy Guidance | - Comprehensive: includes various component ecosystem (EMIS, LMS, digital assessment).  - Based on OECD survey data and studies comparative between countries.  - Provides guide structured and actionable policies​ followed up.  - Includes AI issues in education with equity perspective. | - More nature descriptive and normative, less analysis critical in-depth. -  Survey data Possible No covers non-OECD context in general adequate.  - No There is evaluation implementation or impact term long. | - Can become global benchmark for maker policy.  - Encourage responsible AI integration Responsible and fair.  - Facilitate benchmarking between countries. | - No “one-size-fits-all” risk adjustment adequate contextual support.  - Dependence on inadequate digital infrastructure and capacity evenly distributed.  - Potential exclusion group marginal in digital transformation. | OECD (2023) |
| T69 | Adolescent Loneliness & Digital Technology | - Longitudinal data at scale large (PISA, 37 countries, n > 1 million).  - Analysis multivariate with control variables economics and demography.  - Shows consistent global pattern (loneliness increased in 36 countries).  - Linking loneliness with smartphone and internet access. | - Cross-sectional design (causality No can proven).  - Only measures “school loneliness”, not encompassing loneliness in a general.  - No explore mechanism psychosocial in a way deep. | - Can push intervention policy related health adolescent mentality.  - Basis for study advanced about impact technology towards well-being.  - Strengthening argument For regulations use technology in adolescents. | - Increased loneliness can make things worse crisis adolescent mental health.  - Digital technology can make things worse isolation social If no managed with good.  - Risk stigmatization technology without balanced solution.​ | Twenge (2021) |
| T70 | Hybrid Learning & Digital Equity in Higher Education | - Study empirical based survey with question open and closed.  - Highlight experience real student during pandemic.  - Identifying digital divide and inequality access.  - Offers recommendation practical for hybrid learning. | - Sample limited (151 students) from one university). -  Survey time (August 2020) may be No represent experience term long.  - No there is quantitative data deep about mental health impact. | - Hybrid models can increase flexibility and inclusion.  - Can encourage universities to invest in digital infrastructure and mental support.  - Opening opportunity for pedagogy innovative and assessment alternative. | - The digital divide can widen inequality education.  - Decline mental well-being can influence retention and achievement academic - Challenges​  technical and pedagogical in implementation of hybrid learning. | Bashir (2021) |
| T71 | AI in Education: Policy & Ethical Framework | - Comprehensive guide from an international body (UNESCO).  - Connecting AI with SDG 4 (education) inclusive and quality).  - Highlighting risk ethics and inequality.  - Offering recommendation clear and oriented policies​ action. | - Characteristic normative and prospective, not yet tested implementation.  - Challenges technical and financial for implementation in developing countries.  - Potential resistance from stakeholders interest education. | - AI can personalize learning and improving access education.  - Opening opportunity global collaboration in fair AI development.  - Can strengthen teacher and management capacity education. | - AI can make things worse digital and social inequality.  - Data privacy and algorithmic bias can harm group vulnerable.  - Slow regulation​ can left behind from development technology. | UNESCO (2021) |

# Table A5. Thematic Clusters and Strategic Analysis

| Theme Cluster | TC# | Theme | Strategic Intensity | Key Strategic Elements | Representative Sources |
| --- | --- | --- | --- | --- | --- |
| Pedagogical Innovation & AI | TC1 | AI & Adaptive Learning | S: ●●●○ W: ●●●○ O: ●●○○ T: ●●●○ | S: Personalization, engagement boost W: Algorithmic bias, data quality O: Fairness-by-design AI T: Teacher deskilling, bias at scale | Ali et al. (2024), Gligorea et al. (2023), Arantes (2023), Mac Fadden et al. (2024), UNESCO (2021), Capraro (2024), Wach (2023) |
| Digital Equity & Data Justice | TC2 | Digital Inequality & Data Equity | S: ●●○○ W: ●●●○ O: ●●●○ T: ●●●● | S: Data-driven personalization W: Policy fragmentation, plagiarism concerns O: AI/AR to bridge inclusion gaps T: Bias amplification, widening divide | Pierce & Cleary (2024), Queiroga et al. (2024), Vassilakopoulou (2023), Timsal et al. (2024), Ventrella & Cotnam-Kappel (2024), Sunny et al. (2024), Miller & Liu (2023) |
| Inclusive & Culturally Responsive EdTech | TC3 | Inclusive Education & Cultural Relevance | S: ●●●● W: ●●●○ O: ●●●● T: ●●●○ | S: Cultural relevance, participatory design W: Western-centric design, tokenism risks O: Decolonial frameworks, localized content T: Digital colonialism, epistemic exclusion | Koole et al. (2024), Shaghaghi et al. (2022), Creed et al. (2024), Pappas et al. (2018), Regmi (2024), Cockerham (2024), Zhan et al. (2022) |
| Post-COVID Educational Resilience | TC4 | Education & COVID-19 Response | S: ●●●○ W: ●●●● O: ●●●○ T: ●●●○ | S: Flexibility, hybrid learning W: Mental health decline, access gaps O: Inclusive policy reform, digital training T: Widening inequalities, retention drop | Engzell (2021), Goudeau (2021), Khlaif (2021), Bashir (2021), Pal (2021), Beaunoyer (2020), Nguyen (2020) |
| Health & Financial Digital Inclusion | TC5 | Digital Health & Financial Inclusion | S: ●●●○ W: ●●●○ O: ●●●○ T: ●●●○ | S: Strong meta-analysis, targeted interventions W: Age/income gaps, low literacy O: Segmented programs, multistakeholder collaboration T: Exclusion risks, widening gaps | Estrela (2023), Ren (2023), Demir (2022), Yao (2022), Aziz (2021), Li (2022), Heeks (2022) |
| Algorithmic Society & Ethics | TC6 | Algorithmic Society & Ethics | S: ●●●○ W: ●●●○ O: ●●●○ T: ●●●● | S: Sociological depth, critical awareness W: Power concentration, dominance bias O: Algorithmic literacy, regulation T: Erosion of autonomy, systemic bias | Burrell (2021), Gran (2021), Wach (2023), Heath et al. (2024), Macgilchrist (2019), Kuhn et al. (2023) |
| Digital Transformation in Schools | TC7 | Digital School Transformation | S: ●●●○ W: ●●●○ O: ●●●○ T: ●●●○ | S: Efficiency, engagement, personalization W: Digital capacity gaps, low readiness O: Post-COVID digitalization, policy support T: Inter-school inequality, digital fatigue | Timotheou (2023), Sunny et al. (2024), Miller & Liu (2023), Balli & Singla (2024), Marques Queiroga et al. (2024), Weisberg & Dawson (2024), Yang & Hong (2024) |
| Sustainability & SDGs in EdTech | TC8 | Sustainability & SDGs in EdTech | S: ●●●○ W: ●●●○ O: ●●●○ T: ●●○○ | S: Integration of SDGs, contextual learning W: Teacher unfamiliarity, infrastructure limits O: Curriculum development, global collaboration T: Access inequality, resource gaps | Álvarez-Otero et al. (2018), Hübscher et al. (2024), Chalmeta & Barbeito-Caamaño (2024), McGarr (2023), Mukhuty (2022), OECD (2023) |
| Gamification & STEM Motivation | TC9 | Gamification & STEM Motivation | S: ●●●○ W: ●●○○ O: ●●●○ T: ●●○○ | S: Motivation, retention, soft skills W: Inconsistent design, novelty fade O: STEM integration, skill-building games T: Cultural mismatch, unequal access | Kalogiannakis et al. (2021), Zhang (2024), Shenkoya & Kim (2023), Apps et al. (2019), Wang et al. (2024) |
| AR/VR for Immersive Learning | TC10 | AR/VR for Immersive Learning | S: ●●●○ W: ●●●○ O: ●●●○ T: ●●●○ | S: Experiential learning, collaboration W: Accessibility barriers, high costs O: Participatory AR/VR, localized content T: Institutional resistance, digital ableism | Creed et al. (2024), Esposito (2024), Eljak et al. (2024) |
| Teacher Digital Competence & PD | TC11 | Teacher Digital Competence | S: ●●●○ W: ●●●○ O: ●●●○ T: ●●●○ | S: Increased SDG awareness, behavior change W: Low baseline knowledge, curriculum pressure O: Integration of SDGs in teacher training T: Systemic resistance, lack of school support | McGarr (2023), Weisberg & Dawson (2024), Yang & Hong (2024), Pappas et al. (2018), Ventrella & Cotnam-Kappel (2024) |
| Global South & Development | TC12 | Global South & Digital Development | S: ●●○○ W: ●●●○ O: ●●●○ T: ●●●● | S: New conceptual frameworks, critical insights W: Value extraction by dominant groups, low connectivity O: Policy intervention frameworks, indigenous innovation T: Structural inequality reinforcement | Heeks (2022), Bonina (2021), Aziz (2021), Sunny et al. (2024), Timsal et al. (2024), Khlaif (2021) |
| Elderly & Digital Inclusion | TC13 | Elderly & Digital Inclusion | S: ●●●○ W: ●●●○ O: ●●●○ T: ●●●○ | S: Practical recommendations, critical issue spotlight W: Limited access, low literacy, social isolation O: Digital training programs, connectivity initiatives T: Double exclusion: social & digital | Seifert (2021), Xie (2020), Jaarsveld (2020), Livingstone (2020), Wasserman (2020) |
| Future of Work & Skills | TC14 | Future of Work & Skills | S: ●●●○ W: ●●●○ O: ●●●○ T: ●●●○ | S: Multidisciplinary review, diverse theoretical perspectives W: Job polarization, wage inequality O: Education reform, creativity-based jobs T: Technological unemployment, dehumanization of work | Kolade (2022), Ciarli (2021), Mukhuty (2022), Du (2020), Lin (2021) |
| Data & Platform Governance | TC15 | Data & Platform Governance | S: ●●●○ W: ●●●○ O: ●●●○ T: ●●●○ | S: Conceptual clarity, research agenda W: Focus on developing nations, lack of Southern perspective O: Integration with sustainability research T: Structural inequality perpetuation | Vassilakopoulou (2023), Lythreatis (2022), Bonina (2021), Yao (2022), Korhonen et al. (2024) |
| Social Media & Digital Communication | TC16 | Social Media & Digital Communication | S: ●●●○ W: ●●●○ O: ●●●○ T: ●●●○ | S: Rapid information spread, global collaboration W: Misinformation, limited active engagement O: Critical media literacy education T: Harm to marginalized groups | Chalmeta & Barbeito-Caamaño (2024), Heath et al. (2024), Twenge (2021), Nguyen (2020) |

Ali, D., Fatemi, Y., Boskabadi, E., Nikfar, M., Ugwuoke, J., & Ali, H. (2024). ChatGPT in Teaching and Learning: A Systematic Review. *Education Sciences*, *14*(6), 643. https://doi.org/10.3390/educsci14060643

Álvarez-Otero, J., & de Lázaro y Torres, M. L. (2018). Education in sustainable development goals using the spatial data infrastructures and the TPACK model. *Education Sciences*, *8*(4), 171. https://doi.org/10.3390/educsci8040171

Apps, T., Beckman, K., & Bennett, S. (2019). Engaging with Bourdieu’s theory of practice: an empirical tool for exploring school students’ technology practice. *Technology, Pedagogy and Education*, *28*(4), 413–423. https://doi.org/10.1080/1475939X.2019.1657934

Arantes, J. A. (2023). Personalization in Australian K-12 classrooms: how might digital teaching and learning tools produce intangible consequences for teachers’ workplace conditions? *Australian Educational Researcher*, *50*(3), 863–880. https://doi.org/10.1007/s13384-022-00530-7

Aziz, A., & Naima, U. (2021). Rethinking digital financial inclusion: Evidence from Bangladesh. *Technology in Society*, *64*, 101509. https://doi.org/10.1016/j.techsoc.2020.101509

Balli, O., & Singla, E. (2024). Dimensions of scale: Connected Learning Initiative (CLIx)—a case study of educational technology initiative in India. *Educational Technology Research and Development*, *72*(4), 2213–2235. https://doi.org/10.1007/s11423-024-10372-y

Bashir, A., Bashir, S., Rana, K., Lambert, P., & Vernallis, A. (2021). Post-COVID-19 Adaptations; the Shifts Towards Online Learning, Hybrid Course Delivery and the Implications for Biosciences Courses in the Higher Education Setting. *Frontiers in Education*, *6*. https://doi.org/10.3389/feduc.2021.711619

Beaunoyer, E., Dupéré, S., & Guitton, M. J. (2020). COVID-19 and digital inequalities: Reciprocal impacts and mitigation strategies. *Computers in Human Behavior*, *111*, 106424. https://doi.org/10.1016/j.chb.2020.106424

Bo, N. S. W. (2024). OECD digital education outlook 2023: Towards an effective education ecosystem. In *Hungarian Educational Research Journal* (OECD Digital Education Outlook, Vol. 15, Issue 2). OECD. https://doi.org/10.1556/063.2024.00340

Bonina, C., Koskinen, K., Eaton, B., & Gawer, A. (2021). Digital platforms for development: Foundations and research agenda. *Information Systems Journal*, *31*(6), 869–902. https://doi.org/10.1111/isj.12326

Burrell, J., & Fourcade, M. (2021). The Society of Algorithms. *Annual Review of Sociology*, *47*(1), 213–237. https://doi.org/10.1146/annurev-soc-090820-020800

Capraro, V., Lentsch, A., Acemoglu, D., Akgun, S., Akhmedova, A., Bilancini, E., Bonnefon, J.-F., Brañas-Garza, P., Butera, L., Douglas, K. M., Everett, J. A. C., Gigerenzer, G., Greenhow, C., Hashimoto, D. A., Holt-Lunstad, J., Jetten, J., Johnson, S., Kunz, W. H., Longoni, C., … Viale, R. (2024). The impact of generative artificial intelligence on socioeconomic inequalities and policy making. *PNAS Nexus*, *3*(6). https://doi.org/10.1093/pnasnexus/pgae191

Chalmeta, R., & Barbeito-Caamaño, A. M. (2024). Framework for using online social networks for sustainability awareness. *Online Information Review*, *48*(2), 334–353. https://doi.org/10.1108/OIR-03-2023-0116

Ciarli, T., Kenney, M., Massini, S., & Piscitello, L. (2021). Digital technologies, innovation, and skills: Emerging trajectories and challenges. *Research Policy*, *50*(7), 104289. https://doi.org/10.1016/j.respol.2021.104289

Cockerham, D. (2024). Participatory action research: building understanding, dialogue, and positive actions in a changing digital environment. *Educational Technology Research and Development*, *72*(5), 2763–2791. https://doi.org/10.1007/s11423-023-10294-1

Creed, C., Al-Kalbani, M., Theil, A., Sarcar, S., & Williams, I. (2024). Inclusive Augmented and Virtual Reality: A Research Agenda. *International Journal of Human–Computer Interaction*, *40*(20), 6200–6219. https://doi.org/10.1080/10447318.2023.2247614

Demir, A., Pesqué-Cela, V., Altunbas, Y., & Murinde, V. (2022). Fintech, financial inclusion and income inequality: a quantile regression approach. *The European Journal of Finance*, *28*(1), 86–107. https://doi.org/10.1080/1351847X.2020.1772335

Du, M., Chen, Q., Xiao, J., Yang, H., & Ma, X. (2020). Supply Chain Finance Innovation Using Blockchain. *IEEE Transactions on Engineering Management*, *67*(4), 1045–1058. https://doi.org/10.1109/TEM.2020.2971858

Eljak, H., Ibrahim, A. O., Saeed, F., Hashem, I. A. T., Abdelmaboud, A., Syed, H. J., Abulfaraj, A. W., Ismail, M. A. Bin, & Elsafi, A. (2024). E-Learning-Based Cloud Computing Environment: A Systematic Review, Challenges, and Opportunities. *IEEE Access*, *12*, 7329–7355. https://doi.org/10.1109/ACCESS.2023.3339250

Engzell, P., Frey, A., & Verhagen, M. D. (2021). Learning loss due to school closures during the COVID-19 pandemic. *Proceedings of the National Academy of Sciences*, *118*(17). https://doi.org/10.1073/pnas.2022376118

Esposito, C. (2024). Reimagining place in internationalization at a distance: An exploration of students’ experiences in virtual exchange. *British Journal of Educational Technology*. https://doi.org/10.1111/bjet.13545

Estrela, M., Semedo, G., Roque, F., Ferreira, P. L., & Herdeiro, M. T. (2023). Sociodemographic determinants of digital health literacy: A systematic review and meta-analysis. *International Journal of Medical Informatics*, *177*, 105124. https://doi.org/10.1016/j.ijmedinf.2023.105124

Gligorea, I., Cioca, M., Oancea, R., Gorski, A.-T., Gorski, H., & Tudorache, P. (2023). Adaptive Learning Using Artificial Intelligence in e-Learning: A Literature Review. *Education Sciences*, *13*(12), 1216. https://doi.org/10.3390/educsci13121216

Goudeau, S., Sanrey, C., Stanczak, A., Manstead, A., & Darnon, C. (2021). Why lockdown and distance learning during the COVID-19 pandemic are likely to increase the social class achievement gap. *Nature Human Behaviour*, *5*(10), 1273–1281. https://doi.org/10.1038/s41562-021-01212-7

Gran, A.-B., Booth, P., & Bucher, T. (2021). To be or not to be algorithm aware: a question of a new digital divide? *Information, Communication & Society*, *24*(12), 1779–1796. https://doi.org/10.1080/1369118X.2020.1736124

Heath, M. K., Krutka, D. G., & Gleason, B. (2024). “See results anyway”: auditing social media as educational technology. *Information and Learning Sciences*, *125*(9), 650–672. https://doi.org/10.1108/ILS-12-2023-0205

Heeks, R. (2022). Digital inequality beyond the digital divide: conceptualizing adverse digital incorporation in the global South. *Information Technology for Development*, *28*(4), 688–704. https://doi.org/10.1080/02681102.2022.2068492

Hübscher, C., Hensel-Börner, S., & Henseler, J. (2024). Marketing education for sustainable development. *Spanish Journal of Marketing - ESIC*, *28*(3), 310–333. https://doi.org/10.1108/SJME-06-2022-0131

Kalogiannakis, M., Papadakis, S., & Zourmpakis, A.-I. (2021). Gamification in Science Education. A Systematic Review of the Literature. *Education Sciences*, *11*(1), 22. https://doi.org/10.3390/educsci11010022

Khlaif, Z. N., Salha, S., & Kouraichi, B. (2021). Emergency remote learning during COVID-19 crisis: Students’ engagement. *Education and Information Technologies*, *26*(6), 7033–7055. https://doi.org/10.1007/s10639-021-10566-4

Kolade, O., & Owoseni, A. (2022). Employment 5.0: The work of the future and the future of work. *Technology in Society*, *71*, 102086. https://doi.org/10.1016/j.techsoc.2022.102086

Koole, M., Smith, M., Traxler, J., Adam, T., & Footring, S. (2024). Decolonising Educational Technology. *Education Sciences*, *14*(10), 1070. https://doi.org/10.3390/educsci14101070

Korhonen, J., Panwar, R., Henderson, J., Fernholz, K., Leggett, Z., Meyer, E., & Bhuta, A. A. R. (2024). Gaps in diversity representation and data insufficiencies in the U.S. forest sector workforce analysis. *Trees, Forests and People*, *15*, 100486. https://doi.org/10.1016/j.tfp.2023.100486

Kuhn, C., Khoo, S.-M., Czerniewicz, L., Lilley, W., Bute, S., Crean, A., Abegglen, S., Burns, T., Sinfield, S., Jandrić, P., Knox, J., & MacKenzie, A. (2023). *Understanding Digital Inequality: A Theoretical Kaleidoscope* (pp. 333–373). https://doi.org/10.1007/978-3-031-35411-3_17

Li, G., Zhang, R., Feng, S., & Wang, Y. (2022). Digital finance and sustainable development: Evidence from environmental inequality in China. *Business Strategy and the Environment*, *31*(7), 3574–3594. https://doi.org/10.1002/bse.3105

Lin, Z., Lin, M., Champagne, B., Zhu, W.-P., & Al-Dhahir, N. (2021). Secrecy-Energy Efficient Hybrid Beamforming for Satellite-Terrestrial Integrated Networks. *IEEE Transactions on Communications*, *69*(9), 6345–6360. https://doi.org/10.1109/TCOMM.2021.3088898

Livingstone, S., & Blum-Ross, A. (2020). *Parenting for a Digital Future*. Oxford University PressNew York. https://doi.org/10.1093/oso/9780190874698.001.0001

Lythreatis, S., Singh, S. K., & El-Kassar, A.-N. (2022). The digital divide: A review and future research agenda. *Technological Forecasting and Social Change*, *175*, 121359. https://doi.org/10.1016/j.techfore.2021.121359

Mac Fadden, I., García-Alonso, E.-M., & López Meneses, E. (2024). Science Mapping of AI as an Educational Tool Exploring Digital Inequalities: A Sociological Perspective. *Multimodal Technologies and Interaction*, *8*(12), 106. https://doi.org/10.3390/mti8120106

Macgilchrist, F. (2019). Cruel optimism in edtech: when the digital data practices of educational technology providers inadvertently hinder educational equity. *Learning, Media and Technology*, *44*(1), 77–86. https://doi.org/10.1080/17439884.2018.1556217

Marques Queiroga, E., Sarmanho Siqueira, E., Dos Santos Portela, C., Damasceno Cordeiro, T., Ibert Bittencourt, I., Isotani, S., Ferreira Mello, R., Muñoz, R., & Cechinel, C. (2024). Data-Driven Strategies for Achieving School Equity: Insights From Brazil and Policy Recommendations. *IEEE Access*, *12*, 101646–101659. https://doi.org/10.1109/ACCESS.2024.3422822

Martins Van Jaarsveld, G. (2020). The Effects of COVID-19 Among the Elderly Population: A Case for Closing the Digital Divide. *Frontiers in Psychiatry*, *11*. https://doi.org/10.3389/fpsyt.2020.577427

McGarr, O. (2023). Investigating student teachers’ responses to including sustainable development as part of their professional digital competence development. *Technology, Pedagogy and Education*, *32*(5), 653–665. https://doi.org/10.1080/1475939X.2023.2265934

Miller, R., & Liu, K. (2023). After the Virus: Disaster Capitalism, Digital Inequity, and Transformative Education for the Future of Schooling. *Education and Urban Society*, *55*(5), 533–554. https://doi.org/10.1177/00131245211065419

Mukhuty, S., Upadhyay, A., & Rothwell, H. (2022). Strategic sustainable development of Industry 4.0 through the lens of social responsibility: The role of human resource practices. *Business Strategy and the Environment*, *31*(5), 2068–2081. https://doi.org/10.1002/bse.3008

Nguyen, M. H., Gruber, J., Fuchs, J., Marler, W., Hunsaker, A., & Hargittai, E. (2020). Changes in Digital Communication During the COVID-19 Global Pandemic: Implications for Digital Inequality and Future Research. *Social Media + Society*, *6*(3). https://doi.org/10.1177/2056305120948255

Pal, D., & Patra, S. (2021). University Students’ Perception of Video-Based Learning in Times of COVID-19: A TAM/TTF Perspective. *International Journal of Human–Computer Interaction*, *37*(10), 903–921. https://doi.org/10.1080/10447318.2020.1848164

Pappas, M. A., Papoutsi, C., & Drigas, A. S. (2018). Policies, Practices, and Attitudes toward Inclusive Education: The Case of Greece. *Social Sciences*, *7*(6), 90. https://doi.org/10.3390/socsci7060090

Pierce, G. L., & Cleary, P. F. (2024). The persistent educational digital divide and its impact on societal inequality. *PLOS ONE*, *19*(4), e0286795. https://doi.org/10.1371/journal.pone.0286795

Queiroga, E. M., Siqueira, E. S., Portela, C. D. S., Cordeiro, T. D., Bittencourt, I. I., Isotani, S., Mello, R. F., Muñoz, R., & Cechinel, C. (2024). Data-Driven Strategies for Achieving School Equity: Insights From Brazil and Policy Recommendations. *IEEE Access*, *12*, 101646–101659. https://doi.org/10.1109/ACCESS.2024.3422822

Regmi, K. D. (2024). The rise of learning technology in an unequal world: potentials and limitations in enhancing lifelong learning. *International Review of Education*, *70*(3), 433–452. https://doi.org/10.1007/s11159-023-10058-2

Ren, X., Zeng, G., & Gozgor, G. (2023). How does digital finance affect industrial structure upgrading? Evidence from Chinese prefecture-level cities. *Journal of Environmental Management*, *330*, 117125. https://doi.org/10.1016/j.jenvman.2022.117125

Seifert, A., Cotten, S. R., & Xie, B. (2021). A Double Burden of Exclusion? Digital and Social Exclusion of Older Adults in Times of COVID-19. *The Journals of Gerontology: Series B*, *76*(3), e99–e103. https://doi.org/10.1093/geronb/gbaa098

Shaghaghi, N., Ghosh, S., Ali, F., & Ali, A. B. (2022). *An English to Urdu Educational Video Translation Pipeline to Reinforce Mother-Tongue Based Learning* (pp. 61–74). https://doi.org/10.1007/978-3-030-96585-3_5

Shenkoya, T., & Kim, E. (2023). Sustainability in Higher Education: Digital Transformation of the Fourth Industrial Revolution and Its Impact on Open Knowledge. *Sustainability (Switzerland)*, *15*(3). https://doi.org/10.3390/su15032473

Sunny, B., Shukla, N., Mishra, A. K., & Jaheer Mukthar, K. P. (2024). *Addressing the Educational Technology Divide in India: An Analysis of Access, Adoption, and Equity in Digital Learning* (pp. 103–112). https://doi.org/10.1007/978-981-99-7798-7_8

Timotheou, S., Miliou, O., Dimitriadis, Y., Sobrino, S. V., Giannoutsou, N., Cachia, R., Monés, A. M., & Ioannou, A. (2023). Impacts of digital technologies on education and factors influencing schools’ digital capacity and transformation: A literature review. *Education and Information Technologies*, *28*(6), 6695–6726. https://doi.org/10.1007/s10639-022-11431-8

Timsal, A., Shah, U., & Hodgson, V. (2024). Socio-Digital Disadvantage Within Management Education: A Study of MBA Students’ Experiences of Digital Technologies. *Journal of Management Education*, *48*(1), 52–79. https://doi.org/10.1177/10525629231208186

Twenge, J. M., Haidt, J., Blake, A. B., McAllister, C., Lemon, H., & Le Roy, A. (2021). Worldwide increases in adolescent loneliness. *Journal of Adolescence*, *93*(1), 257–269. https://doi.org/10.1016/j.adolescence.2021.06.006

UNESCO. (2021). AI and education: guidance for policy-makers. In *AI and education: guidance for policy-makers*. UNESCO Publishing. https://doi.org/10.54675/pcsp7350

Vassilakopoulou, P., & Hustad, E. (2023). Bridging Digital Divides: a Literature Review and Research Agenda for Information Systems Research. *Information Systems Frontiers*, *25*(3), 955–969. https://doi.org/10.1007/s10796-020-10096-3

Ventrella, F. M., & Cotnam-Kappel, M. (2024). Examining digital capital and digital inequalities in Canadian elementary schools: Insights from teachers. *Telematics and Informatics*, *86*, 102070. https://doi.org/10.1016/j.tele.2023.102070

Wach, K., Duong, C. D., Ejdys, J., Kazlauskaitė, R., Korzynski, P., Mazurek, G., Paliszkiewicz, J., & Ziemba, E. (2023). The dark side of generative artificial intelligence: A critical analysis of controversies and risks of ChatGPT. *Entrepreneurial Business and Economics Review*, *11*(2), 7–30. https://doi.org/10.15678/EBER.2023.110201

Wang, F., Ni, X., Zhang, M., & Zhang, J. (2024). Educational digital inequality: A meta-analysis of the relationship between digital device use and academic performance in adolescents. *Computers & Education*, *213*, 105003. https://doi.org/10.1016/j.compedu.2024.105003

Wasserman, D., Iosue, M., Wuestefeld, A., & Carli, V. (2020). Adaptation of evidence‐based suicide prevention strategies during and after the <scp>COVID</scp> ‐19 pandemic. *World Psychiatry*, *19*(3), 294–306. https://doi.org/10.1002/wps.20801

Weisberg, L., & Dawson, K. (2024). Picturing digital equity in the curriculum: Cultivating preservice teachers’ digital equity mindsets in a technology integration course. *Computers & Education*, *211*, 104988. https://doi.org/10.1016/j.compedu.2024.104988

Xie, B., Charness, N., Fingerman, K., Kaye, J., Kim, M. T., & Khurshid, A. (2020). When Going Digital Becomes a Necessity: Ensuring Older Adults’ Needs for Information, Services, and Social Inclusion During COVID-19. *Journal of Aging & Social Policy*, *32*(4–5), 460–470. https://doi.org/10.1080/08959420.2020.1771237

Yang, T., & Hong, X. (2024). The Educational Technology Divide in Glocalisation: A Perspective for Interpreting Early Childhood Teachers’ Practices of ICT Implementation. *Early Education and Development*, *35*(1), 150–168. https://doi.org/10.1080/10409289.2023.2231321

Yao, R., Zhang, W., Evans, R., Cao, G., Rui, T., & Shen, L. (2022). Inequities in Health Care Services Caused by the Adoption of Digital Health Technologies: Scoping Review. *Journal of Medical Internet Research*, *24*(3), e34144. https://doi.org/10.2196/34144

Zhan, Z., Shen, W., Xu, Z., Niu, S., & You, G. (2022). A bibliometric analysis of the global landscape on STEM education (2004-2021): towards global distribution, subject integration, and research trends. *Asia Pacific Journal of Innovation and Entrepreneurship*, *16*(2), 171–203. https://doi.org/10.1108/APJIE-08-2022-0090

Zhang, Z. (2024). *Revolutionizing Education: The Transformative Power of Educational Technology in Online Learning* (pp. 523–529). https://doi.org/10.2991/978-2-38476-253-8_62
