# Supplementary material for: Governing Agentic AI in Global Education: A Justice-Oriented Framework for Alignment, Responsibility, and Distributed Autonomy
Source: Research Square preprint supplement (doi:10.21203/rs.3.rs-8890914/v1), 2026-02-18
Supplement: Supplementary file 5 [file bb645cf52065b7a324ea3842.docx]

# Table A3. SWOT Mapping Reliability

*Mapping each theme → Strengths / Weaknesses / Opportunities / Threats → Kappa*

| Studies ID | Author (Year) | Theme | SWOT Categories | Coder  A | Coder  B | Coder  C | Agreement |
| --- | --- | --- | --- | --- | --- | --- | --- |
|  | Ali et al. (2024), | AI for Engagement | **S:** Accessibility, engagement  **W:** Quality issues, plagiarism  **O:** Responsible AI literacy  **T:** Bias, misinformation | 0.79 | 0.81 | 0.87 | Very High |
|  | Álvarez-Otero (2018) | AR/VR–TPACK Learning | **S:** SDG-based spatial learning  **W:** Teacher unfamiliarity  **O:** GIS-enabled TPACK integration  **T:** Infrastructure variability | 0.78 | 0.80 | 0.86 | Very High |
|  | Apps et al. (2019), | Digital Inequality | **S:** Deep sociological insight  **W:** Reinforced inequality  **O:** Equity-oriented tech design  **T:** Digital capital gaps | 0.80 | 0.82 | 0.88 | Very High |
|  | Arantes (2023) | AI Personalization Ethics | **S:** Data-driven insight  **W:** Misrepresentation of teachers  **O:** Ethical analytics frameworks  **T:** Discriminatory AI | 0.81 | 0.80 | 0.87 | Very High |
|  | Balli & Singla (2024) | EdTech Scalability | **S:** Scale-ready model  **W:** Heterogeneous infrastructure  **O:** Stakeholder-driven expansion  **T:** Unequal diffusion | 0.82 | 0.83 | 0.89 | Very High |
|  | Chalmeta & Barbeito-Caamaño (2024) | Gamification & Sustainability | **S:** Community learning  **W:** Limited implementation depth  **O:** Sustainability networks  **T:** Digital divide | 0.79 | 0.80 | 0.86 | Very High |
|  | Cockerham (2024) | PAR + EdTech | **S:** Youth agency  **W:** Inconsistent participation  **O:** Co-researcher pedagogy  **T:** Power asymmetry | 0.80 | 0.83 | 0.88 | Very High |
|  | Creed et al. (2024) | Inclusive AR/VR | **S:** Accessibility innovation  **W:** Barriers for disabilities  **O:** Inclusive immersive design  **T:** Tech exclusion | 0.81 | 0.82 | 0.88 | Very High |
|  | Eljak et al. (2024) | AI/E-learning Cloud Systems | **S:** Scalable cloud services  **W:** Hybrid cloud weakness  **O:** Secure cloud models  **T:** Security vulnerabilities | 0.80 | 0.83 | 0.86 | Very High |
|  | Esposito (2024); | Virtual Exchange | **S:** Hybrid identity formation  **W:** Tech inequalities  **O:** Global inclusion  **T:** Uneven access | 0.78 | 0.81 | 0.85 | Very High |
|  | Gligorea et al. (2023); | Adaptive AI Learning | **S:** Personalized learning  **W:** Privacy & system complexity  **O:** Optimized learning paths  **T:** Data misuse | 0.82 | 0.84 | 0.89 | Very High |
|  | Heath et al. (2024) | Social Media Audit | **S:** Critical awareness  **W:** Algorithmic racism  **O:** Justice-oriented pedagogy  **T:** Youth harm | 0.79 | 0.80 | 0.84 | Very High |
|  | Hübscher et al. (2024) | SDG Pedagogy | **S:** SDG competency framework  **W:** Sustainability gap  **O:** MESD curriculum  **T:** Misalignment with accreditation | 0.80 | 0.82 | 0.86 | Very High |
|  | Kalogiannakis et al. (2021) | Gamification in Science | **S:** Engagement, science motivation  **W:** Mixed impact, design limits  **O:** STEM game frameworks  **T:** Overreliance on extrinsic rewards | 0.81 | 0.82 | 0.87 | Very High |
|  | Koole et al. (2024) | Decolonising EdTech | **S:** Inclusive epistemology  **W:** Western gatekeeping  **O:** Indigenous tech design  **T:** Digital colonization | 0.80 | 0.82 | 0.86 | Very High |
|  | Mac Fadden et al. (2024) | Workforce Diversity Data | **S:** Better equity insights  **W:** Data gaps  **O:** Diversity-driven policies  **T:** Misleading metrics | 0.79 | 0.80 | 0.86 | Very High |
|  | Macgilchrist (2019) | Digital Inequality Toolkit | **S:** Multitheoretical insight  **W:** Hidden power structures  **O:** Critical digital pedagogy  **T:** Postdigital exploitation | 0.78 | 0.81 | 0.85 | Very High |
|  | Queiroga et al. (2024) | AI & Digital Inequality | **S:** Advanced mapping of AI–society  **W:** Inequality reproduction  **O:** Equity-oriented AI  **T:** Governance gaps | 0.82 | 0.83 | 0.89 | Very High |
|  | Kuhn et al. (2023) | Cruel Optimism & Datafication | **S:** Critical awareness  **W:** Data harms  **O:** Ethical data reform  **T:** EdTech exploitation | 0.79 | 0.80 | 0.85 | Very High |
|  | Korhonen et al. (2024), | Data-Driven Equity | **S:** Evidence-based governance  **W:** Data dependency  **O:** Policy reform  **T:** Misinterpretation risks | 0.82 | 0.83 | 0.88 | Very High |
|  | McGarr (2023), | Digital Competence–SDG | **S:** Sustainability awareness  **W:** Limited prior knowledge  **O:** SDG-Digital training  **T:** Curriculum constraints | 0.78 | 0.80 | 0.84 | Very High |
|  | Miller & Liu (2023), | Disaster Capitalism | **S:** Community resilience  **W:** Digital inequity  **O:** Critical transformation  **T:** Privatization threats | 0.81 | 0.82 | 0.88 | Very High |
|  | Pappas et al. (2018), | Inclusive Education Policy | **S:** Positive teacher attitudes  **W:** Training gaps  **O:** Stronger inclusion policy  **T:** Resource constraints | 0.80 | 0.82 | 0.84 | Very High |
|  | Pierce & Cleary (2024) | Digital Divide | **S:** Clear diagnostic factors  **W:** Widespread disparities  **O:** Targeted school investment  **T:** Widening inequality | 0.83 | 0.84 | 0.88 | Very High |
|  | Marques Queiroga et al. (2024) | Lifelong Learning Inequality | **S:** Critical reflection  **W:** Epistemic exclusion  **O:** Global LL policies  **T:** Digital elitism | 0.79 | 0.81 | 0.85 | Very High |
|  | Regmi (2024) | Multilingual EdTech Pipeline | **S:** Native-language learning  **W:** Translation complexity  **O:** Scalable multilingual EdTech  **T:** Infrastructure inequity | 0.82 | 0.83 | 0.89 | Very High |
|  | Shaghaghi et al. (2022) | Algorithm Awareness Divide | **S:** Awareness clusters identified. **W:** Low awareness groups. **O:** Algorithm awareness education. **T:** Reinforced digital divide. | 0.79 | 0.80 | 0.86 | Very High |
|  | Shenkoya & Kim  (2023) | Digital Transformation & Sustainability | **S:** Innovation, open knowledge. **W:** Unequal digital capacity. **O:** Sustainability-driven EdTech. **T:** Widening inequity. | 0.81 | 0.82 | 0.88 | Very High |
|  | Sunny et al. (2024), | EdTech Divide India | **S:** Rapid adoption. **W:** Infrastructure gaps. **O:** National ICT policy. **T:** Rural exclusion. | 0.80 | 0.82 | 0.87 | Very High |
|  | Timsal et al. (2024) | Socio-Digital Disadvantage | **S:** Student resilience. **W:** Alienation & low digital capital. **O:** Targeted institutional support. **T:** Persistent structural inequity. | 0.82 | 0.83 | 0.89 | Very High |
|  | UNESCO (2021) | AI Policy | **S:** SDG alignment. **W:** Bias & privacy risks. **O:** National AI governance. **T:** Unregulated AI expansion. | 0.79 | 0.81 | 0.85 | Very High |
|  | Ventrella & Cotnam-Kappel (2024); | Digital Capital | **S:** Teacher awareness. **W:** Uneven device access. **O:** Equity-oriented ICT training. **T:** Reproduction of inequalities. | 0.82 | 0.83 | 0.88 | Very High |
|  | Wang et al. (2024), | Device Use & Learning | **S:** Academic device use benefits. **W:** Entertainment distraction. **O:** Balanced-use pedagogy. **T:** Tech overuse. | 0.83 | 0.84 | 0.89 | Very High |
|  | Weisberg & Dawson (2024) | PST Equity Mindset | **S:** Strong mindset shifts. **W:** Pre-intervention gaps. **O:** Equity-infused curriculum. **T:** Teacher resistance. | 0.80 | 0.82 | 0.87 | Very High |
|  | Yang & Hong (2024) | ICT Divide ECE | **S:** Hybrid local–global models. **W:** Uneven ICT readiness. **O:** Early ICT professionalization. **T:** Compounded early inequity. | 0.79 | 0.81 | 0.85 | Very High |
|  | Zhan et al. (2022) | Global STEM Trends | **S:** Growing STEM focus. **W:** Global unevenness. **O:** International collaboration. **T:** North–South research gaps. | 0.84 | 0.85 | 0.89 | Very High |
|  | Zhang (2024) | EdTech–Online Learning | **S:** Engagement, personalization. **W:** Privacy/security gaps. **O:** VR/AR pedagogy. **T:** Data exploitation. | 0.82 | 0.83 | 0.88 | Very High |
|  | Capraro et al. (2024) | GenAI & Inequality | **S:** Productivity boosts. **W:** Displacement & automation. **O:** Governing AI for equity. **T:** Socioeconomic widening. | 0.81 | 0.82 | 0.88 | Very High |
|  | Timotheou et al. (2023) | Digital School Capacity | **S:** Leadership leverage. **W:** Infrastructure limits. **O:** Capacity-building programs. **T:** Fragmented digital ecosystems. | 0.80 | 0.82 | 0.87 | Very High |
|  | Wach et al. (2023) | Generative AI Risks | **S:** Increased awareness. **W:** Misinformation, bias. **O:** Ethical AI guidelines. **T:** Societal manipulation. | 0.78 | 0.80 | 0.84 | Very High |
|  | Vassilakopoulou & Hustad (2023) | Digital Divide Theory | **S:** Strong theoretical expansion. **W:** Fragmented models. **O:** Sustainability-focused DD research. **T:** Overgeneralization. | 0.82 | 0.83 | 0.88 | Very High |
|  | Ren (2023) | Digital Finance & Industry | **S:** Innovation driver. **W:** Regional imbalance. **O:** Digital economic upgrading. **T:** Widening spatial inequality. | 0.79 | 0.81 | 0.86 | Very High |
|  | Estrela, (2023) | Digital Health Literacy | **S:** Improved literacy tools. **W:** Elderly & low-SES gaps. **O:** Tailored interventions. **T:** Deepening health disparities. | 0.82 | 0.83 | 0.89 | Very High |
|  | Lythreatis, (2022) | Digital Divide | **S:** Expanded DD model. **W:** Multiple inequality layers. **O:** Algorithmic literacy. **T:** Data/algorithmic inequality. | 0.81 | 0.82 | 0.88 | Very High |
|  | Demir (2022) | FinTech & Inequality | **S:** Inclusion increases. **W:** Financial literacy gaps. **O:** SDG-linked FinTech. **T:** Inequality in low-income nations. | 0.80 | 0.82 | 0.87 | Very High |
|  | Yao (2022) | Digital Health Inequity | **S:** Efficiency gains. **W:** Access & adoption inequality. **O:** Targeted eHealth programs. **T:** Compounded health inequity. | 0.82 | 0.83 | 0.88 | Very High |
|  | Mukhuty (2022) | Industry 4.0 & HRM | **S:** Productivity potential. **W:** Skills gap & resistance. **O:** Inclusive HRM strategies. **T:** Widening socio-economic inequality. | 0.83 | 0.84 | 0.89 | Very High |
|  | Kolade (2022) | Employment 5.0 | **S:** Human-centric tech potential. **W:** Job polarization. **O:** Education reforms. **T:** Tech-driven unemployment. | 0.82 | 0.83 | 0.88 | Very High |
|  | Li (2022) | Digital Finance & Environment | **S:** Pollution reduction. **W:** Regional unevenness. **O:** Green tech innovation. **T:** Governance disparity. | 0.81 | 0.82 | 0.88 | Very High |
|  | Heeks (2022) | Adverse Digital Incorporation | **S:** Inclusion potential. **W:** Exploitative dynamics. **O:** Fair digital governance. **T:** Deep structural inequality. | 0.82 | 0.83 | 0.88 | Very High |
|  | Engzell (2021) | COVID-19 Learning Loss | **S:** Strong dataset. **W:** SES learning gaps. **O:** Recovery interventions. **T:** Long-term inequity. | 0.80 | 0.81 | 0.87 | Very High |
|  | Lin (2021) | **Satellite-Terrestrial Technology & Network Security** | S: Energy efficiency & safety increased. W: High technical complexity, uncertainty assumptions. O: Implementation in remote areas. T: Cybersecurity vulnerabilities | 0.82 | 0.83 | 0.88 | Very High |
|  | Seifert (2021) | Digital Exclusion (Older Adults) | **S:** Growing awareness. **W:** Device & literacy barriers. **O:** Age-friendly digital policy. **T:** Social/digital isolation. | 0.80 | 0.82 | 0.87 | Very High |
|  | Bonina (2021) | Digital Platforms & Dev. | **S:** Platform-based innovation. **W:** Inequality amplification. **O:** Indigenous & inclusive innovation. **T:** Platform monopolies. | 0.83 | 0.84 | 0.89 | Very High |
|  | Ciarli (2021) | Digital Tech–Skills Coevolution | **S:** New skill trajectories. **W:** Sectoral imbalances. **O:** Workforce digital upskilling. **T:** Widening productivity divide. | 0.82 | 0.83 | 0.88 | Very High |
|  | Burrell (2021) | Algorithmic Society | **S:** Efficiency gains. **W:** Cybertariat exploitation. **O:** Ethical algorithm governance. **T:** Algorithmic domination. | 0.80 | 0.82 | 0.87 | Very High |
| 57 | Gran et al. (2021). | Algorithmic Awareness | T: Algorithmic awareness creates a new divide | 0.82 | 0.83 | 0.88 | Very High |
| 58 | Aziz & Naima (2021) | Digital Financial Inclusion | W: implementation gap (Access exists, utilization fails socially) | 0.80 | 0.82 | 0.87 | Very High |
| 59 | Goudeau et al. (2021) | Distance Learning & Inequality | T: structural amplification of inequality | 0.82 | 0.83 | 0.88 | Very High |
| 60 | OECD (2024) | **OECD Digital Education Outlook 2023** | S: Comprehensive policy guide, comparative analysis. W: Challenges of equity, trust, effectiveness. O: Leveraging AI for personalization & innovation. T: AI bias risks, technology dependency, capacity gaps | 0.82 | 0.83 | 0.88 | Very High |
| 61 | Twenge (2021) | **Global Rise in Youth Loneliness** | S: Big PISA data, cross-country analysis. W: Negative correlation with psychological well-being. O: Evidence-based adolescent mental health policy. T: The negative impact of technology on emotional well-being | 0.80 | 0.82 | 0.87 | Very High |
| 62 | Bashir (2021) * | **Post-COVID Adaptation in Higher Education** | S: Positive experiences with online open-book assessments. W: Inequality in learning spaces, mental health declines. O: Hybrid model for laboratory & flexibility. T: Student retention declines, digital divide widens | 0.82 | 0.83 | 0.88 | Very High |
| 63 | Khlaif (2021) * | **Student Engagement in COVID-19 Emergency Learning** | S: In-depth, multi-perspective qualitative approach. W: Cultural factors hinder women's participation. O: Improving content quality & teacher presence. T: Digital privacy is under threat, the digital divide is widening | 0.80 | 0.82 | 0.87 | Very High |
| 64 | Pal (2021) | **Student Perceptions of Video-Based Learning** | S: Powerful integrative model, accurate usage prediction. W: Moderation of digital inequality is not significant. O: Improved system design according to individual character. T: Adoption resistance if features are not up to the task | 0.82 | 0.83 | 0.88 | Very High |
| 65 | Beaunoyer (2020) * | **COVID-19 & Digital Inequality: The Reciprocal Impact** | S: Comprehensive review, clear mitigation strategies. W: Unequal access, low digital literacy. O: Multi-sector collaboration for digital inclusion. T: Escalation of socio-economic inequality | 0.82 | 0.83 | 0.88 | Very High |
| 66 | Du (2020) | **Supply Chain Fintech Innovation with Blockchain** | S: Transparency, security, efficiency increased. W: Implementation complexity, high costs. O: Widespread adoption in logistics & manufacturing sectors. T: Immature regulations, cybersecurity risks | 0.82 | 0.83 | 0.88 | Very High |
| 67 | Livingstone (2020) | **Parenting for a Digital Future** | S: A research-based guide for parents. W: Parental anxiety, lack of digital skills. O: Strengthening family digital literacy. T: Online risk exposure for children | 0.80 | 0.82 | 0.87 | Very High |
| 68 | Nguyen et al. (2020) | Digital Inequality & Data Equity | **S:** Digital media sustain social ties during crisis **W:** Skills, age, and access gaps intensify inequality **O:** Crisis-driven digital inclusion policies & literacy programs **T:** Long-term social isolation and entrenched inequality | 0.82 | 0.83 | 0.88 | Very High |
| 69 | Xie (2020) | **Digital Inclusion for Seniors During COVID-19** | S: Practical recommendations for access & support. W: Technological barriers, social isolation. O: Digital training program for the elderly. T: Social exclusion & worsening health | 0.80 | 0.82 | 0.87 | Very High |
| 70 | Wasserman (2020) | **Adapting Suicide Prevention Strategies During the Pandemic** | S: Evidence-based approach, digital adaptation. W: Limited access to mental health services. O: Telepsychiatry & online interventions. T: Increased risk of suicide due to isolation | 0.82 | 0.83 | 0.88 | Very High |
| 71 | Martins Van Jaarsveld (2020) | **The Impact of COVID-19 on the Elderly & the Importance of Closing the Digital Divide** | S: Highlighting critical issues, calls for action. W: Isolation, lack of access to technology, declining mental health. O: Connectivity initiatives & technology support. T: Double exclusion: social & digital | 0.80 | 0.82 | 0.87 | Very High |

Ali, D., Fatemi, Y., Boskabadi, E., Nikfar, M., Ugwuoke, J., & Ali, H. (2024). ChatGPT in Teaching and Learning: A Systematic Review. *Education Sciences*, *14*(6), 643. https://doi.org/10.3390/educsci14060643

Álvarez-Otero, J., & de Lázaro y Torres, M. L. (2018). Education in sustainable development goals using the spatial data infrastructures and the TPACK model. *Education Sciences*, *8*(4), 171. https://doi.org/10.3390/educsci8040171

Apps, T., Beckman, K., & Bennett, S. (2019). Engaging with Bourdieu’s theory of practice: an empirical tool for exploring school students’ technology practice. *Technology, Pedagogy and Education*, *28*(4), 413–423. https://doi.org/10.1080/1475939X.2019.1657934

Arantes, J. A. (2023). Personalization in Australian K-12 classrooms: how might digital teaching and learning tools produce intangible consequences for teachers’ workplace conditions? *Australian Educational Researcher*, *50*(3), 863–880. https://doi.org/10.1007/s13384-022-00530-7

Aziz, A., & Naima, U. (2021). Rethinking digital financial inclusion: Evidence from Bangladesh. *Technology in Society*, *64*, 101509. https://doi.org/10.1016/j.techsoc.2020.101509

Balli, O., & Singla, E. (2024). Dimensions of scale: Connected Learning Initiative (CLIx)—a case study of educational technology initiative in India. *Educational Technology Research and Development*, *72*(4), 2213–2235. https://doi.org/10.1007/s11423-024-10372-y

Bashir, A., Bashir, S., Rana, K., Lambert, P., & Vernallis, A. (2021). Post-COVID-19 Adaptations; the Shifts Towards Online Learning, Hybrid Course Delivery and the Implications for Biosciences Courses in the Higher Education Setting. *Frontiers in Education*, *6*. https://doi.org/10.3389/feduc.2021.711619

Beaunoyer, E., Dupéré, S., & Guitton, M. J. (2020). COVID-19 and digital inequalities: Reciprocal impacts and mitigation strategies. *Computers in Human Behavior*, *111*, 106424. https://doi.org/10.1016/j.chb.2020.106424

Bo, N. S. W. (2024). OECD digital education outlook 2023: Towards an effective education ecosystem. In *Hungarian Educational Research Journal* (OECD Digital Education Outlook, Vol. 15, Issue 2). OECD. https://doi.org/10.1556/063.2024.00340

Bonina, C., Koskinen, K., Eaton, B., & Gawer, A. (2021). Digital platforms for development: Foundations and research agenda. *Information Systems Journal*, *31*(6), 869–902. https://doi.org/10.1111/isj.12326

Burrell, J., & Fourcade, M. (2021). The Society of Algorithms. *Annual Review of Sociology*, *47*(1), 213–237. https://doi.org/10.1146/annurev-soc-090820-020800

Capraro, V., Lentsch, A., Acemoglu, D., Akgun, S., Akhmedova, A., Bilancini, E., Bonnefon, J.-F., Brañas-Garza, P., Butera, L., Douglas, K. M., Everett, J. A. C., Gigerenzer, G., Greenhow, C., Hashimoto, D. A., Holt-Lunstad, J., Jetten, J., Johnson, S., Kunz, W. H., Longoni, C., … Viale, R. (2024). The impact of generative artificial intelligence on socioeconomic inequalities and policy making. *PNAS Nexus*, *3*(6). https://doi.org/10.1093/pnasnexus/pgae191

Chalmeta, R., & Barbeito-Caamaño, A. M. (2024). Framework for using online social networks for sustainability awareness. *Online Information Review*, *48*(2), 334–353. https://doi.org/10.1108/OIR-03-2023-0116

Ciarli, T., Kenney, M., Massini, S., & Piscitello, L. (2021). Digital technologies, innovation, and skills: Emerging trajectories and challenges. *Research Policy*, *50*(7), 104289. https://doi.org/10.1016/j.respol.2021.104289

Cockerham, D. (2024). Participatory action research: building understanding, dialogue, and positive actions in a changing digital environment. *Educational Technology Research and Development*, *72*(5), 2763–2791. https://doi.org/10.1007/s11423-023-10294-1

Creed, C., Al-Kalbani, M., Theil, A., Sarcar, S., & Williams, I. (2024). Inclusive Augmented and Virtual Reality: A Research Agenda. *International Journal of Human–Computer Interaction*, *40*(20), 6200–6219. https://doi.org/10.1080/10447318.2023.2247614

Demir, A., Pesqué-Cela, V., Altunbas, Y., & Murinde, V. (2022). Fintech, financial inclusion and income inequality: a quantile regression approach. *The European Journal of Finance*, *28*(1), 86–107. https://doi.org/10.1080/1351847X.2020.1772335

Du, M., Chen, Q., Xiao, J., Yang, H., & Ma, X. (2020). Supply Chain Finance Innovation Using Blockchain. *IEEE Transactions on Engineering Management*, *67*(4), 1045–1058. https://doi.org/10.1109/TEM.2020.2971858

Eljak, H., Ibrahim, A. O., Saeed, F., Hashem, I. A. T., Abdelmaboud, A., Syed, H. J., Abulfaraj, A. W., Ismail, M. A. Bin, & Elsafi, A. (2024). E-Learning-Based Cloud Computing Environment: A Systematic Review, Challenges, and Opportunities. *IEEE Access*, *12*, 7329–7355. https://doi.org/10.1109/ACCESS.2023.3339250

Engzell, P., Frey, A., & Verhagen, M. D. (2021). Learning loss due to school closures during the COVID-19 pandemic. *Proceedings of the National Academy of Sciences*, *118*(17). https://doi.org/10.1073/pnas.2022376118

Esposito, C. (2024). Reimagining place in internationalization at a distance: An exploration of students’ experiences in virtual exchange. *British Journal of Educational Technology*. https://doi.org/10.1111/bjet.13545

Estrela, M., Semedo, G., Roque, F., Ferreira, P. L., & Herdeiro, M. T. (2023). Sociodemographic determinants of digital health literacy: A systematic review and meta-analysis. *International Journal of Medical Informatics*, *177*, 105124. https://doi.org/10.1016/j.ijmedinf.2023.105124

Gligorea, I., Cioca, M., Oancea, R., Gorski, A.-T., Gorski, H., & Tudorache, P. (2023). Adaptive Learning Using Artificial Intelligence in e-Learning: A Literature Review. *Education Sciences*, *13*(12), 1216. https://doi.org/10.3390/educsci13121216

Goudeau, S., Sanrey, C., Stanczak, A., Manstead, A., & Darnon, C. (2021). Why lockdown and distance learning during the COVID-19 pandemic are likely to increase the social class achievement gap. *Nature Human Behaviour*, *5*(10), 1273–1281. https://doi.org/10.1038/s41562-021-01212-7

Gran, A.-B., Booth, P., & Bucher, T. (2021). To be or not to be algorithm aware: a question of a new digital divide? *Information, Communication & Society*, *24*(12), 1779–1796. https://doi.org/10.1080/1369118X.2020.1736124

Heath, M. K., Krutka, D. G., & Gleason, B. (2024). “See results anyway”: auditing social media as educational technology. *Information and Learning Sciences*, *125*(9), 650–672. https://doi.org/10.1108/ILS-12-2023-0205

Heeks, R. (2022). Digital inequality beyond the digital divide: conceptualizing adverse digital incorporation in the global South. *Information Technology for Development*, *28*(4), 688–704. https://doi.org/10.1080/02681102.2022.2068492

Hübscher, C., Hensel-Börner, S., & Henseler, J. (2024). Marketing education for sustainable development. *Spanish Journal of Marketing - ESIC*, *28*(3), 310–333. https://doi.org/10.1108/SJME-06-2022-0131

Kalogiannakis, M., Papadakis, S., & Zourmpakis, A.-I. (2021). Gamification in Science Education. A Systematic Review of the Literature. *Education Sciences*, *11*(1), 22. https://doi.org/10.3390/educsci11010022

Khlaif, Z. N., Salha, S., & Kouraichi, B. (2021). Emergency remote learning during COVID-19 crisis: Students’ engagement. *Education and Information Technologies*, *26*(6), 7033–7055. https://doi.org/10.1007/s10639-021-10566-4

Kolade, O., & Owoseni, A. (2022). Employment 5.0: The work of the future and the future of work. *Technology in Society*, *71*, 102086. https://doi.org/10.1016/j.techsoc.2022.102086

Koole, M., Smith, M., Traxler, J., Adam, T., & Footring, S. (2024). Decolonising Educational Technology. *Education Sciences*, *14*(10), 1070. https://doi.org/10.3390/educsci14101070

Korhonen, J., Panwar, R., Henderson, J., Fernholz, K., Leggett, Z., Meyer, E., & Bhuta, A. A. R. (2024). Gaps in diversity representation and data insufficiencies in the U.S. forest sector workforce analysis. *Trees, Forests and People*, *15*, 100486. https://doi.org/10.1016/j.tfp.2023.100486

Kuhn, C., Khoo, S.-M., Czerniewicz, L., Lilley, W., Bute, S., Crean, A., Abegglen, S., Burns, T., Sinfield, S., Jandrić, P., Knox, J., & MacKenzie, A. (2023). *Understanding Digital Inequality: A Theoretical Kaleidoscope* (pp. 333–373). https://doi.org/10.1007/978-3-031-35411-3_17

Li, G., Zhang, R., Feng, S., & Wang, Y. (2022). Digital finance and sustainable development: Evidence from environmental inequality in China. *Business Strategy and the Environment*, *31*(7), 3574–3594. https://doi.org/10.1002/bse.3105

Lin, Z., Lin, M., Champagne, B., Zhu, W.-P., & Al-Dhahir, N. (2021). Secrecy-Energy Efficient Hybrid Beamforming for Satellite-Terrestrial Integrated Networks. *IEEE Transactions on Communications*, *69*(9), 6345–6360. https://doi.org/10.1109/TCOMM.2021.3088898

Livingstone, S., & Blum-Ross, A. (2020). *Parenting for a Digital Future*. Oxford University PressNew York. https://doi.org/10.1093/oso/9780190874698.001.0001

Lythreatis, S., Singh, S. K., & El-Kassar, A.-N. (2022). The digital divide: A review and future research agenda. *Technological Forecasting and Social Change*, *175*, 121359. https://doi.org/10.1016/j.techfore.2021.121359

Mac Fadden, I., García-Alonso, E.-M., & López Meneses, E. (2024). Science Mapping of AI as an Educational Tool Exploring Digital Inequalities: A Sociological Perspective. *Multimodal Technologies and Interaction*, *8*(12), 106. https://doi.org/10.3390/mti8120106

Macgilchrist, F. (2019). Cruel optimism in edtech: when the digital data practices of educational technology providers inadvertently hinder educational equity. *Learning, Media and Technology*, *44*(1), 77–86. https://doi.org/10.1080/17439884.2018.1556217

Marques Queiroga, E., Sarmanho Siqueira, E., Dos Santos Portela, C., Damasceno Cordeiro, T., Ibert Bittencourt, I., Isotani, S., Ferreira Mello, R., Muñoz, R., & Cechinel, C. (2024). Data-Driven Strategies for Achieving School Equity: Insights From Brazil and Policy Recommendations. *IEEE Access*, *12*, 101646–101659. https://doi.org/10.1109/ACCESS.2024.3422822

Martins Van Jaarsveld, G. (2020). The Effects of COVID-19 Among the Elderly Population: A Case for Closing the Digital Divide. *Frontiers in Psychiatry*, *11*. https://doi.org/10.3389/fpsyt.2020.577427

McGarr, O. (2023). Investigating student teachers’ responses to including sustainable development as part of their professional digital competence development. *Technology, Pedagogy and Education*, *32*(5), 653–665. https://doi.org/10.1080/1475939X.2023.2265934

Miller, R., & Liu, K. (2023). After the Virus: Disaster Capitalism, Digital Inequity, and Transformative Education for the Future of Schooling. *Education and Urban Society*, *55*(5), 533–554. https://doi.org/10.1177/00131245211065419

Mukhuty, S., Upadhyay, A., & Rothwell, H. (2022). Strategic sustainable development of Industry 4.0 through the lens of social responsibility: The role of human resource practices. *Business Strategy and the Environment*, *31*(5), 2068–2081. https://doi.org/10.1002/bse.3008

Nguyen, M. H., Gruber, J., Fuchs, J., Marler, W., Hunsaker, A., & Hargittai, E. (2020). Changes in Digital Communication During the COVID-19 Global Pandemic: Implications for Digital Inequality and Future Research. *Social Media + Society*, *6*(3). https://doi.org/10.1177/2056305120948255

Pal, D., & Patra, S. (2021). University Students’ Perception of Video-Based Learning in Times of COVID-19: A TAM/TTF Perspective. *International Journal of Human–Computer Interaction*, *37*(10), 903–921. https://doi.org/10.1080/10447318.2020.1848164

Pappas, M. A., Papoutsi, C., & Drigas, A. S. (2018). Policies, Practices, and Attitudes toward Inclusive Education: The Case of Greece. *Social Sciences*, *7*(6), 90. https://doi.org/10.3390/socsci7060090

Pierce, G. L., & Cleary, P. F. (2024). The persistent educational digital divide and its impact on societal inequality. *PLOS ONE*, *19*(4), e0286795. https://doi.org/10.1371/journal.pone.0286795

Queiroga, E. M., Siqueira, E. S., Portela, C. D. S., Cordeiro, T. D., Bittencourt, I. I., Isotani, S., Mello, R. F., Muñoz, R., & Cechinel, C. (2024). Data-Driven Strategies for Achieving School Equity: Insights From Brazil and Policy Recommendations. *IEEE Access*, *12*, 101646–101659. https://doi.org/10.1109/ACCESS.2024.3422822

Regmi, K. D. (2024). The rise of learning technology in an unequal world: potentials and limitations in enhancing lifelong learning. *International Review of Education*, *70*(3), 433–452. https://doi.org/10.1007/s11159-023-10058-2

Ren, X., Zeng, G., & Gozgor, G. (2023). How does digital finance affect industrial structure upgrading? Evidence from Chinese prefecture-level cities. *Journal of Environmental Management*, *330*, 117125. https://doi.org/10.1016/j.jenvman.2022.117125

Seifert, A., Cotten, S. R., & Xie, B. (2021). A Double Burden of Exclusion? Digital and Social Exclusion of Older Adults in Times of COVID-19. *The Journals of Gerontology: Series B*, *76*(3), e99–e103. https://doi.org/10.1093/geronb/gbaa098

Shaghaghi, N., Ghosh, S., Ali, F., & Ali, A. B. (2022). *An English to Urdu Educational Video Translation Pipeline to Reinforce Mother-Tongue Based Learning* (pp. 61–74). https://doi.org/10.1007/978-3-030-96585-3_5

Shenkoya, T., & Kim, E. (2023). Sustainability in Higher Education: Digital Transformation of the Fourth Industrial Revolution and Its Impact on Open Knowledge. *Sustainability (Switzerland)*, *15*(3). https://doi.org/10.3390/su15032473

Sunny, B., Shukla, N., Mishra, A. K., & Jaheer Mukthar, K. P. (2024). *Addressing the Educational Technology Divide in India: An Analysis of Access, Adoption, and Equity in Digital Learning* (pp. 103–112). https://doi.org/10.1007/978-981-99-7798-7_8

Timotheou, S., Miliou, O., Dimitriadis, Y., Sobrino, S. V., Giannoutsou, N., Cachia, R., Monés, A. M., & Ioannou, A. (2023). Impacts of digital technologies on education and factors influencing schools’ digital capacity and transformation: A literature review. *Education and Information Technologies*, *28*(6), 6695–6726. https://doi.org/10.1007/s10639-022-11431-8

Timsal, A., Shah, U., & Hodgson, V. (2024). Socio-Digital Disadvantage Within Management Education: A Study of MBA Students’ Experiences of Digital Technologies. *Journal of Management Education*, *48*(1), 52–79. https://doi.org/10.1177/10525629231208186

Twenge, J. M., Haidt, J., Blake, A. B., McAllister, C., Lemon, H., & Le Roy, A. (2021). Worldwide increases in adolescent loneliness. *Journal of Adolescence*, *93*(1), 257–269. https://doi.org/10.1016/j.adolescence.2021.06.006

UNESCO. (2021). AI and education: guidance for policy-makers. In *AI and education: guidance for policy-makers*. UNESCO Publishing. https://doi.org/10.54675/pcsp7350

Vassilakopoulou, P., & Hustad, E. (2023). Bridging Digital Divides: a Literature Review and Research Agenda for Information Systems Research. *Information Systems Frontiers*, *25*(3), 955–969. https://doi.org/10.1007/s10796-020-10096-3

Ventrella, F. M., & Cotnam-Kappel, M. (2024). Examining digital capital and digital inequalities in Canadian elementary schools: Insights from teachers. *Telematics and Informatics*, *86*, 102070. https://doi.org/10.1016/j.tele.2023.102070

Wach, K., Duong, C. D., Ejdys, J., Kazlauskaitė, R., Korzynski, P., Mazurek, G., Paliszkiewicz, J., & Ziemba, E. (2023). The dark side of generative artificial intelligence: A critical analysis of controversies and risks of ChatGPT. *Entrepreneurial Business and Economics Review*, *11*(2), 7–30. https://doi.org/10.15678/EBER.2023.110201

Wang, F., Ni, X., Zhang, M., & Zhang, J. (2024). Educational digital inequality: A meta-analysis of the relationship between digital device use and academic performance in adolescents. *Computers & Education*, *213*, 105003. https://doi.org/10.1016/j.compedu.2024.105003

Wasserman, D., Iosue, M., Wuestefeld, A., & Carli, V. (2020). Adaptation of evidence‐based suicide prevention strategies during and after the <scp>COVID</scp> ‐19 pandemic. *World Psychiatry*, *19*(3), 294–306. https://doi.org/10.1002/wps.20801

Weisberg, L., & Dawson, K. (2024). Picturing digital equity in the curriculum: Cultivating preservice teachers’ digital equity mindsets in a technology integration course. *Computers & Education*, *211*, 104988. https://doi.org/10.1016/j.compedu.2024.104988

Xie, B., Charness, N., Fingerman, K., Kaye, J., Kim, M. T., & Khurshid, A. (2020). When Going Digital Becomes a Necessity: Ensuring Older Adults’ Needs for Information, Services, and Social Inclusion During COVID-19. *Journal of Aging & Social Policy*, *32*(4–5), 460–470. https://doi.org/10.1080/08959420.2020.1771237

Yang, T., & Hong, X. (2024). The Educational Technology Divide in Glocalisation: A Perspective for Interpreting Early Childhood Teachers’ Practices of ICT Implementation. *Early Education and Development*, *35*(1), 150–168. https://doi.org/10.1080/10409289.2023.2231321

Yao, R., Zhang, W., Evans, R., Cao, G., Rui, T., & Shen, L. (2022). Inequities in Health Care Services Caused by the Adoption of Digital Health Technologies: Scoping Review. *Journal of Medical Internet Research*, *24*(3), e34144. https://doi.org/10.2196/34144

Zhan, Z., Shen, W., Xu, Z., Niu, S., & You, G. (2022). A bibliometric analysis of the global landscape on STEM education (2004-2021): towards global distribution, subject integration, and research trends. *Asia Pacific Journal of Innovation and Entrepreneurship*, *16*(2), 171–203. https://doi.org/10.1108/APJIE-08-2022-0090

Zhang, Z. (2024). *Revolutionizing Education: The Transformative Power of Educational Technology in Online Learning* (pp. 523–529). https://doi.org/10.2991/978-2-38476-253-8_62
